# 1 Sites of Circadian Clock Neuron Plasticity Mediate Sensory Integration and 2 Entrainment.

3

4 Fernández MP<sup>1,4\*</sup>, Pettibone HL<sup>1,2</sup>, Roell CJ<sup>2</sup>, Davey CE<sup>2</sup>, Huynh KV<sup>2</sup>, Lennox SM<sup>2</sup>, Kostadinov BS<sup>3</sup> and  
5 Shafer OT<sup>1,2,\*</sup>

6

7 1- Advanced Science Research Center, The Graduate Center, City University of New York. New York City, NY  
8 10031.

9 2- Department of Molecular, Cellular, and Developmental Biology, University of Michigan. Ann Arbor, MI  
10 48109.

11 3- Mathematics Department, NYC College of Technology, City University of New York. Brooklyn, NY 11201.

12 4- Present Address: Department of Neuroscience and Behavior, Barnard College of Columbia University. New  
13 York City, NY 10027.

14

15

16 \*Correspondence should be addressed to OT Shafer, Neuroscience Initiative, Advanced Science  
17 Research Center, at [oshafer@gc.cuny.edu](mailto:oshafer@gc.cuny.edu) or Maria de la Paz Fernandez, Department of Neuroscience and  
18 Behavior, Barnard College of Columbia University, at [mfernand@barnard.edu](mailto:mfernand@barnard.edu).

19

## 20 **Summary**

21 Networks of circadian timekeeping in the brain display marked daily changes in neuronal morphology. In  
22 *Drosophila melanogaster*, the striking daily structural remodeling of the dorsal medial termini of the  
23 small ventral lateral neurons has long been hypothesized to mediate endogenous circadian timekeeping.  
24 To test this model, we have specifically abrogated these sites of daily neuronal remodeling through the  
25 reprogramming of neural development and assessed the effects on circadian timekeeping and clock  
26 outputs. Remarkably, the loss of these sites has no measurable effects on endogenous circadian  
27 timekeeping or on any of the major output functions of the small ventral lateral neurons. Rather, their loss  
28 reduces sites of glutamatergic sensory neurotransmission that normally encodes naturalistic time-cues  
29 from the environment. These results support an alternative model: structural plasticity in critical clock  
30 neurons is the basis for proper integration of light and temperature and gates sensory inputs into circadian  
31 clock neuron networks.

32

## 33 Introduction

34

35 The proper daily timing of sleep and activity is the product of two processes, endogenous circadian  
36 timekeeping and the daily resetting of circadian rhythms to local time (i.e., entrainment) (Roenneberg et  
37 al., 2003). The importance of these two processes for health are made clear by a growing body of  
38 evidence that post-industrial light and social environments result in weak and unstable circadian  
39 entrainment, leading to a loss of sleep, increased cancer risk, and metabolic derangement (Roenneberg  
40 and Mellow, 2016). The master circadian clock, which drives daily rhythms in sleep and activity, resides  
41 in small islands of brain tissue (Herzog, 2007) wherein connections among diverse neuron types ensure a  
42 robustness in circadian timekeeping that is lacking in peripheral tissues (Hastings et al., 2018). Such  
43 circadian timekeeping networks require inputs from sensory pathways to entrain to daily environmental  
44 rhythms (Golombek and Rosenstein, 2010). Understanding the network properties of circadian  
45 timekeeping and entrainment in the brain is a central challenge in chronobiology.

46

47 Critical neurons within master timekeeping networks in both insect and mammalian brains undergo  
48 striking daily changes in cellular morphology (reviewed by (Bosler et al., 2015) (Krzeptowski et al.,  
49 2018)). In *Drosophila* the small ventrolateral neurons (s-LN<sub>v</sub>s) undergo daily clock-controlled structural  
50 remodeling, displaying significantly more extensive and highly branched dorsomedial projections in the  
51 early day relative to the early night (Fernández et al., 2008), a rhythm driven by daily changes in the  
52 outgrowth and de-fasciculation of terminal arborizations (Petsakou et al., 2015) (Sivachenko et al., 2013)  
53 (Gorostiza et al., 2014). The s-LN<sub>v</sub>s are critical for circadian timekeeping and properly timed behavioral  
54 outputs in fly and produce Pigment Dispersing Factor (PDF), which is likewise required for robust  
55 circadian timekeeping (Helfrich-Förster, 1998) (Renn et al., 1999). The termini of the s-LN<sub>v</sub> dorsal  
56 projections contain synaptic and dense core vesicles (Yasuyama and Meinertzhagen, 2010) and their daily  
57 structural changes occur among the neurites of s-LN<sub>v</sub> output targets (Gorostiza et al., 2014; Yasuyama  
58 and Meinertzhagen, 2010). For these reasons the dorsal termini of the s-LN<sub>v</sub>s have long been considered  
59 to be the major sites of s-LN<sub>v</sub> axonal output (Helfrich-Förster, 1998) (Yasuyama and Meinertzhagen,  
60 2010) and their daily structural plasticity is generally assumed to be a mechanism of circadian clock  
61 output in the brain (Bosler et al., 2015).

62

63 Within the hypothalamic suprachiasmatic nuclei (SCN), the master clock of the mammalian brain,  
64 neurons expressing the neuropeptide vasoactive intestinal poly-peptide (VIP) support circadian rhythms  
65 in a manner remarkably similar to PDF expressing clock neurons of *Drosophila*. The loss of VIP or its  
66 receptor results in a syndrome of circadian phenotypes that are highly reminiscent of those accompanying

67 the loss of PDF or its receptor in the fly (Aton et al., 2005; Colwell et al., 2003; Hyun et al., 2005; Lear et  
68 al., 2005; Mertens et al., 2005; Renn et al., 1999). The VIP expressing neurons of the SCN undergo  
69 marked daily changes in morphology, displaying increased glial coverage of somata and dendrites during  
70 the day (Becquet et al., 2008). The morphological changes exhibited by the VIP expressing neurons of the  
71 SCN are accompanied by daytime increases in synaptic inputs, including glutamatergic inputs from the  
72 retinohypothalamic tract, onto VIP neurons (Girardet et al., 2010). Furthermore, retino-recipient  
73 Calbindin-D28K expressing neurons in the hamster SCN display elaborate arborizations in the early  
74 subjective night compared to other times (LeSauter et al., 2009). Taken together, the work on  
75 morphological plasticity in the rat and hamster SCN suggests that it may serve to mediate the integration  
76 of sensory (i.e., light) input (Girardet et al., 2010), however the large numbers and heterogeneity of  
77 neurons composing the SCN make a mechanistic examination of the functional import of such plasticity  
78 difficult to address experimentally.

79  
80 Circadian neuronal remodeling of the *Drosophila* s-LN<sub>v</sub>s requires a functional circadian clock (Fernández  
81 et al., 2008) and neuronal firing promotes daily structural changes in dorsal termini of the s-LN<sub>v</sub>s  
82 (Sivachenko et al., 2013). Nevertheless, structural plasticity persists when these neurons are electrically  
83 silenced, revealing an endogenous cellular program for circadian structural plasticity (Depetris-Chauvin et  
84 al., 2011). Daily s-LN<sub>v</sub> remodeling is driven by daily rhythms in clock-controlled gene expression  
85 (Depetris-Chauvin et al., 2014; Gunawardhana and Hardin, 2017; Petsakou et al., 2015; Sivachenko et al.,  
86 2013) and is therefore considered an output of the molecular clock within these neurons. The daily  
87 extension and retraction displayed by the s-LN<sub>v</sub>s is promoted by clock-driven oscillations in Fasciclin 2  
88 (Fas2) mediated fasciculation/de-fasciculation rhythms (Sivachenko et al., 2013), metalloproteinase  
89 expression rhythms (Depetris-Chauvin et al., 2014), and rhythmic modulation of Rho1 GTPase signaling  
90 that drives daily terminal outgrowth and retraction (Petsakou et al., 2015).

91  
92 An increasing number of studies have reported manipulations of the s-LN<sub>v</sub> dorsal termini that are  
93 accompanied by significant effects on circadian timekeeping and output (Cusumano et al., 2018;  
94 Depetris-Chauvin et al., 2014; Gunawardhana and Hardin, 2017; Petsakou et al., 2015; Sivachenko et al.,  
95 2013). For example, the overexpression of the clock-controlled transcription factor Mef2 results in both  
96 constitutively open/complex termini and in a significant reduction in the percentage of flies able to  
97 maintain endogenous circadian rhythms in activity (Sivachenko et al., 2013). Likewise, the  
98 overexpression of the Rho1 GTPase in LN<sub>v</sub> neurons results in both constitutively simple/closed termini  
99 and a significant weakening of locomotor rhythms (Petsakou et al., 2015). However, manipulations that  
100 cause significant morphological changes in the dorsal termini but nevertheless fail to alter free-running

101 circadian rhythms or clock outputs have also been reported (Cusumano et al., 2018; Depetris-Chauvin et  
102 al., 2014; Petsakou et al., 2015; Sivachenko et al., 2013). Thus, the functional significance of daily s-LN<sub>v</sub>  
103 structural plasticity has not been unequivocally established.

104

105 Here we take advantage of the genetic malleability and relative simplicity of the *Drosophila* clock neuron  
106 network to examine the functional significance of sites of circadian neuronal remodeling in the s-LN<sub>v</sub>s.  
107 By manipulating a well characterized mechanism of neuronal path finding, we have specifically prevented  
108 the development of the s-LN<sub>v</sub> dorsal termini and comprehensively assessed the effects of their loss on  
109 endogenous circadian timekeeping and phasing of clock output. We find that the PDF-mediated  
110 timekeeping and output functions of the s-LN<sub>v</sub>s remain unchanged in the absence of these plastic terminal  
111 arborizations. Rather, we find that these termini mediate sensory inputs and the proper integration of  
112 time-cues from the environment. These results provide clear evidence that the sites of daily structural  
113 remodeling mediate sensory input, integration, and entrainment within the circadian clock neuron network  
114 and suggest that daily structural plasticity likely shapes the responses of circadian clock neurons to  
115 temporal cues from the environment.

116

117 **The expression of *Unc-5* specifically prevents the formation of the s-LN<sub>v</sub> dorsal projection termini.**

118

119 Previous work investigating the relationship between s-LN<sub>v</sub> structural plasticity and circadian  
120 timekeeping employed genetic manipulations that clamped the dorsal termini in constitutively open or  
121 closed configurations, typically through the up- or down-regulation of transcription factors or cell  
122 signaling pathways (e.g. (Sivachenko et al., 2013) (Petsakou et al., 2015)). Most such manipulations have  
123 resulted in significant deficits in circadian sleep/activity rhythms, consistent with the longstanding  
124 hypothesis that s-LN<sub>v</sub> plasticity mediates circadian timekeeping and output. However, several  
125 manipulations that produce defects in s-LN<sub>v</sub> arbor morphology and/or plasticity have failed to produce  
126 circadian output phenotypes (e.g., (Sivachenko et al., 2013) (Depetris-Chauvin et al., 2014)), suggesting  
127 that dorsal termini manipulations that have produced circadian phenotypes may have acted via effects that  
128 were independent of the terminal arbor phenotypes they produced. Thus, though there is a significant  
129 body of evidence linking the sites of s-LN<sub>v</sub> structural plasticity to circadian timekeeping and output, the  
130 functional significance of such plasticity remains an open question. For this reason, we sought to disrupt  
131 the formation of these termini developmentally to test the prediction that the absence of the sites of s-LN<sub>v</sub>  
132 plasticity would produce timekeeping phenotypes reminiscent of the loss of s-LN<sub>v</sub>s or their major  
133 circadian peptide output PDF.

134

135 The formation of s-LN<sub>v</sub> dorsal termini requires a turn toward the midline of the dorsal protocerebrum and  
136 the de-fasciculation of s-LN<sub>v</sub> dorsal projections into fine radiating processes (Figures 1A and 1B;  
137 (Helfrich-Förster, 1995; Helfrich-Förster, 1997)). We found that the over-expression of the repulsive  
138 netrin receptor Unc-5 in all PDF expressing neurons completely abrogated the terminal ramification of the  
139 s-LN<sub>v</sub> dorsal projections (Figure 1 and S1A), most likely by preventing the normal developmental  
140 outgrowth of these termini toward the midline where netrin is secreted during the development of the  
141 embryonic nervous system (Keleman and Dickson, 2001). Unc-5 overexpressing s-LN<sub>v</sub>s displayed a  
142 severely simplified dorsal projection that lacked the normal radiation of the dorsal medial termini (Figure  
143 1A-D), a phenotype reflected by significant reductions in both the length of the dorsal projections and the  
144 brain volume they innervate (Figures 1E-J). Unc-5 overexpression was also accompanied by modest de-  
145 fasciculation of the ascending dorsal projection of the s-LN<sub>v</sub>s (Figure 1A, bottom right and S1C). Unc-5  
146 overexpression had no obvious additional effects on the anatomical features of the small LN<sub>v</sub>s nor did it  
147 modify the anatomy of the large LN<sub>v</sub>s (Figures 1A, and S1B). We conclude that the overexpression of  
148 Unc-5 specifically prevents the formation of the s-LN<sub>v</sub> dorsal termini, the sites of daily remodeling in  
149 these critical clock neurons.

150

#### 151 **PDF-mediated output functions of the s-LN<sub>v</sub>s do not require their dorsal termini.**

152

153 If the plastic dorsal termini of the s-LN<sub>v</sub>s are critical for circadian timekeeping and output signals, the loss  
154 of these termini should behaviorally phenocopy the ablation of these cells or the genetic loss of PDF, their  
155 major circadian output transmitter (Renn et al., 1999). The loss of the LN<sub>v</sub>s and PDF both result in a  
156 syndrome of timekeeping phenotypes that includes the loss of morning anticipation and an advance in the  
157 daily evening peak of activity under light/dark (LD) cycles and a significant weakening of the  
158 endogenous circadian rhythm under constant darkness and temperature (DD) accompanied by a decrease  
159 in free-running period (Renn et al., 1999)(Figures 2A, B, E and 3A). We first asked if the Unc-5  
160 mediated prevention of dorsal termini development would be accompanied by phenotypes reminiscent of  
161 those caused by the loss of PDF under LD cycles. Under a 12h:12h LD cycle, the overexpression of Unc-  
162 5 in PDF expressing neurons had no measurable effects on the anticipation of LD transitions or on the  
163 entrained phase of evening peak activity, with *Pdf-Gal4/UAS-Unc5* flies displaying normal daily profiles  
164 of locomotion that that displayed the normal anticipation of light transitions (Figures 2C-E, S2, and S3).  
165 The s-LN<sub>v</sub>s exert control over much of the circadian clock neuron network through PDF mediated  
166 resetting signals (Stoleru et al., 2005) (Yao and Shafer, 2014) (Yao et al., 2016). When the molecular  
167 clocks within the s-LN<sub>v</sub>s are slowed down by the expression of the mutant clock kinase *Doubletime*<sup>LONG</sup>  
168 (*Dbt*<sup>LONG</sup>), the daily evening peak of activity is delayed (Figure S4A), reflecting a resetting of the so

169 called “evening cells” of the clock neuron network by PDF (Yao and Shafer, 2014) (Yao et al., 2016).  
170 Remarkably the s-LN<sub>v</sub>s were still able to set the evening peak of activity in the absence of their dorsal  
171 termini (Figure S4A).

172  
173 The s-LN<sub>v</sub>s are the most dominant circadian pacemakers within the clock neuron network under  
174 conditions of constant darkness (DD) and temperature (Chatterjee et al., 2018). The loss of PDF peptide  
175 or genetic ablation of the LN<sub>v</sub>s dramatically weakens the endogenous circadian rhythm and produces a  
176 shortening of its free-running period under DD (Renn et al., 1999). Furthermore, when the speed of the  
177 molecular clock is changed within s-LN<sub>v</sub>s, PDF released from these neurons resets the molecular clocks  
178 within other clock neurons and thereby modulates the speed of systemic timekeeping (Stoleru et al., 2005)  
179 (Yao and Shafer, 2014) (Yao et al., 2016) (Chatterjee et al., 2018). If the plastic dorsal termini of the s-  
180 LN<sub>v</sub>s mediate these circadian output functions, we would expect to see clear timekeeping phenotypes  
181 under DD conditions. The loss of the dorsal termini in *Unc-5* expressing LN<sub>v</sub>s was not accompanied by  
182 changes in the proportion of flies displaying endogenous circadian rhythms in locomotor activity, nor did  
183 it produce a shortening of its free-running period (Figures 3A-C, S4B, and Table 1). The expression of the  
184 mutant clock kinase *Dbt<sup>LONG</sup>* only in the PDF expressing LN<sub>v</sub>s coherently sets the period of free-running  
185 sleep/activity rhythms to approximately 27 hours through a PDF-mediated resetting of the molecular  
186 clocks of target clock neurons (Yao and Shafer, 2014) (Yao et al., 2016). Remarkably, the co-expression  
187 of *Unc-5* with *Dbt<sup>LONG</sup>* in the LN<sub>v</sub>s did not prevent these neurons from lengthening the free-running  
188 period of locomotor rhythms or delaying the evening peak of activity on the first day of free-run ((Figure  
189 3A, C, D, S4B and Table 1). Thus, the ability of the s-LN<sub>v</sub>s to control the clock neuron network was not  
190 affected by the absence of their normal sites of daily remodeling. We conclude that the normal sites of  
191 structural plasticity in the dorsal projections of the s-LN<sub>v</sub>s are not required for the established PDF-  
192 dependent output functions of these neurons.

193  
194 **The loss of s-LN<sub>v</sub> dorsal termini causes deficits in the entrainment of locomotor rhythms to**  
195 **naturalistic ramping temperature cycles.**

196  
197 The dorsal termini of the s-LN<sub>v</sub>s rest in close apposition to the neurites of the DN1<sub>p</sub> class of clock neurons  
198 (Figure 4A-B), which are established targets of LN<sub>v</sub> output (Shafer and Taghert, 2009; Zhang et al., 2010)  
199 and serve as major conduits of circadian output signals in the fly brain (Cavanaugh et al., 2014). Serial  
200 electron micrograph reconstructions of the s-LN<sub>v</sub> termini revealed the presence not only of output (i.e.,  
201 pre-synaptic) synapses, but also post-synaptic structures, indicating that the dorsal termini are axo-  
202 dendritic in nature (Yasuyama and Meinertzhagen, 2010). The DN1<sub>p</sub>s provide inhibitory feedback



203 mediated by the release of glutamate onto the s-LN<sub>v</sub>s and to thereby promote sleep (Guo et al., 2016).  
204 Thus, the s-LN<sub>v</sub>s and DN1<sub>p</sub>s form bidirectional connections in the dorsal protocerebrum. The sites of  
205 PDF release from the dorsal termini of the s-LN<sub>v</sub>s appear to be extrasynaptic: PDF-containing dense core  
206 vesicles dock in regions of the dorsal projections that are not directly opposed by post-synaptic  
207 compartments (Yasuyama and Meinertzhagen, 2010), suggesting that PDF released from the dorsal  
208 termini may normally act at a distance. *Unc-5* mediated abrogation of dorsal termini formation clearly  
209 reduced the volume of brain area through which s-LN<sub>v</sub> and DN1<sub>p</sub> neurites reside in apposition (Figure 4).

210

211 The DN1<sub>p</sub>s sensitively monitor environmental temperature (Yadlapalli et al., 2018) and their synaptic  
212 outputs are required for the normal entrainment of sleep/activity cycles to low amplitude step-function  
213 temperature cycles (Chen et al., 2015) and to gradually and constantly ramping temperature cycles  
214 (Yadlapalli et al., 2018). The organization of activity and sleep under such constantly changing  
215 temperature cycles is likely mediated by the inhibition of the s-LN<sub>v</sub>s by the DN1<sub>p</sub>s (Guo et al., 2016;  
216 Yadlapalli et al., 2018). Based on the close apposition of DN1<sub>p</sub> neurites and s-LN<sub>v</sub> dorsal termini and the  
217 axodendritic nature of the latter, we hypothesized that the plastic dorsal termini might be required for the  
218 normal entrainment to gradually ramping temperature cycles, predicting that the abrogation of the s-LN<sub>v</sub>  
219 dorsal termini would lead to changes in the organization of sleep/activity rhythms under such entrainment  
220 conditions.

221

222 Under a 24-hour environmental temperature oscillation (20-28°C), which consisted of constant heating  
223 from 20 to 28°C for 12 hours followed by constant cooling from 28 to 20°C for 12 hours, *Pdf-Gal4/UAS-*  
224 *Unc5* flies differed significantly from their parental controls with regard to the daily pattern of activity.  
225 As previously described for wild type flies (Currie et al., 2009; Yadlapalli et al., 2018), the control *Pdf-*  
226 *Gal4/+* and *UAS-Unc5/+* flies displayed a rather small yet precipitous increase in activity at the onset of  
227 heating followed by gradual increases in locomotion throughout most of the heating phase and a  
228 precipitous drop in activity associated with the onset of cooling (Figure 5A and C). In contrast, *Pdf-*  
229 *Gal4/UAS-Unc5* flies displayed activity rhythms of significantly lower amplitude and did not begin their  
230 major daily increase in locomotion until the end of the heating phase, (Figures 5A and C). We quantified  
231 these features of entrainment in two ways: the ratio of activity levels seen near the end of the day (from  
232 ZT 10 to 12) to the magnitude of the small startle response at the onset of heating (from ZT00 to 02;  
233 Figure 5B) and the heating index (5D), which is based on the correlation between rising temperatures and  
234 locomotor activity (Figure 5D;(Yadlapalli et al., 2018)). Both metrics revealed significant differences  
235 between *Pdf-Gal4/UAS-Unc5* flies and their parental controls reflecting deficits in the ability to time daily  
236 activity increases with rising temperature. These results support the conclusion that the absence of s-LN<sub>v</sub>

237 dorsal termini was accompanied by an inability to properly entrain to naturalistic temperature cycles,  
238 likely due to the inability to integrate input from thermoreceptors via the DN1<sub>ps</sub>.

239

240 The genetic ablation of the PDF expressing LN<sub>v</sub>s results in a profound reduction in the amplitude of the  
241 activity rhythm under gradual temperature cycles, even more severe than those displayed by flies lacking  
242 dorsal termini: LN<sub>v</sub>-ablated flies displayed little evidence of locomotor rhythms under these conditions  
243 (Figure 5E-F). Remarkably, flies lacking PDF peptide displayed normal activity rhythms under such  
244 temperature cycles, coordinating their daily activity increases with rising temperature and displaying a  
245 precipitous decrease in activity associated with the onset of cooling (Figures 5G-H). We conclude that the  
246 normal entrainment of activity rhythms to constantly changing temperature cycles requires LN<sub>v</sub> neurons  
247 but not the peptide transmitter PDF.

248

249 If the dorsal termini are important for the integration of temperature inputs, previous manipulations that  
250 abrogated the dorsal termini of the s-LN<sub>v</sub>s yet failed to produce circadian output phenotypes should  
251 produce clear behavioral phenotypes under gradual temperature cycles. We chose to examine flies over-  
252 expressing Fas2 in the LN<sub>v</sub>s. As previously described (Sivachenko et al., 2013), *Pdf-Gal4/UAS-Fas2*;  
253 flies display a profound and specific loss of the s-LN<sub>v</sub> dorsal termini yet display completely normal  
254 activity rhythms under LD (Figure S5A-G) and strong normally-paced free-running activity rhythms  
255 under DD; (Figure S5 and S6A-B). However, under gradually ramping temperature cycles Fas2 induced  
256 loss of the s-LN<sub>v</sub> dorsal termini produced phenotypes highly reminiscent of those displayed by flies  
257 whose s-LN<sub>v</sub> termini development was prevented through *Unc-5* expression (S6D-E). These results  
258 support the hypothesis that the dorsal termini of the s-LN<sub>v</sub>s are critical for the integration of temperature  
259 inputs for the entrainment of daily activity rhythms.

260

261 **The s-LN<sub>v</sub> dorsal termini puncta display a sparse glutamate receptivity characterized by after-**  
262 **excitation.**

263

264 Excitation of the glutamatergic DN1<sub>ps</sub> produces inhibitory responses in the cell bodies and dorsal  
265 projections of the s-LN<sub>v</sub>s and bath applied glutamate causes hyperpolarization and Ca<sup>2+</sup> decreases in s-  
266 LN<sub>v</sub> cell bodies (Guo et al., 2016). Serial electron micrograph reconstruction of the s-LN<sub>v</sub> dorsal  
267 projection revealed that their termini are sparsely dendritic, displaying approximately 10-fold fewer post-  
268 synaptic compared to presynaptic compartments (Yasuyama and Meinertzhagen, 2010), a ratio typical for  
269 axodendritic neurites in *Drosophila* (Takemura et al., 2008). If the dorsal termini of the s-LN<sub>v</sub>s mediate



270 glutamate reception, we would therefore expect them to respond to bath applied glutamate directly and  
271 sparsely.

272

273 We characterized the effects of glutamate on individual puncta of the dorsal termini through the  
274 expression of the genetically encoded  $\text{Ca}^{2+}$  reporter GCaMP6f (Chen et al., 2013) (Figure 6A and D).  
275 Explanted brains from *Pdf-Gal4/+;UAS-GCaMP6f/+* flies were imaged in hemolymph-like saline  
276 containing 2 $\mu\text{M}$  tetrodotoxin (TTX) to inhibit the contribution of network influences and s-LN<sub>v</sub> firing to  
277 the observed responses. The majority of puncta observed failed to display GCaMP6f responses to 30  
278 second perfusion of 0.5 or 1mM glutamate (+TTX) (Figure 6A-C). However approximately 15% of  
279 optical sections revealed clear excitatory increases in GCaMP6f fluorescence among subsets of puncta  
280 immediately following wash-out or beginning shortly before the end of glutamate perfusion (Figure 6D-  
281 G). Thus, individual puncta of the s-LN<sub>v</sub> dorsal projections appeared to be sparsely and directly receptive  
282 to glutamate, which caused a potent after excitation, suggestive of rebound excitation. Furthermore, these  
283 responses were often seen to begin just before the end of glutamate perfusion, suggesting desensitization.  
284 These features have been observed in the context of inhibition by ligand gated chloride channels (e.g.,  
285 (Boehme et al., 2011; Gielen et al., 2015).

286

287 Regions of interest placed over the distal most regions of the of Unc-5 expressing s-LN<sub>v</sub> dorsal  
288 projections (Figure S7A and D), which maintain the expression of the dendritic marker DscammTM2  
289 ((Wang et al., 2004); Figure S7H-I), displayed a similar incidence of after excitation, though these  
290 responses typically appeared earlier during perfusion compared to normal dorsal termini. (Figure S7F-G).  
291 These results reveal that the puncta of the dorsal termini are normally sparsely receptive to glutamate and  
292 that the expression of Unc5 drastically changes the locations of s-LN<sub>v</sub> dendritic processes in the dorsal  
293 protocerebrum.

294

### 295 **The knockdown of glutamate gated chloride channels in the s-LN<sub>v</sub>s results in temperature** 296 **entrainment deficits.**

297

298 The glutamatergic DN1<sub>p</sub>s are thermo-receptive and required for the proper entrainment to environmental  
299 temperature cycles (Chen et al., 2015; Yadlapalli et al., 2018). Furthermore, these neurons form inhibitory  
300 connections onto the s-LN<sub>v</sub>s (Guo et al., 2016). We hypothesize that sites of daily remodeling in the s-  
301 LN<sub>v</sub> dorsal termini are required for glutamatergic input from the DN1<sub>p</sub> to the s-LN<sub>v</sub> and that this input  
302 mediates the integration of temperature cycles into the circadian clock neuron network. We therefore  
303 predicted that the manipulation of glutamate receptors in the s-LN<sub>v</sub>s would result in significant changes in

304 the organization of activity cycles under constantly changing temperature cycles that would be  
305 reminiscent of those associated with the absence of s-LN<sub>v</sub> dorsal termini. The rebound excitation (Figure  
306 6F-G) and apparent desensitization (Figure 6G) observed in our live imaging experiments were  
307 reminiscent of the behavior of cys-loop inhibitory receptors, which have been shown to produce rebound  
308 excitation in a manner dependent on voltage gated Ca<sup>2+</sup> channels (Boehme et al., 2011) and whose  
309 mechanism of desensitization has been examined in detail (Gielen et al., 2015). For this reason, we  
310 examined the effects of the knockdown of the cys-loop glutamate gated chloride channels within the LN<sub>v</sub>s  
311 on the entrainment of activity rhythms to ramping temperature cycles.

312  
313 The expression of RNAi constructs targeting the glutamate gated chloride channel GluCl $\alpha$  in the LN<sub>v</sub>s  
314 resulted in phenotypes that were remarkably similar to those caused by the prevention of s-LN<sub>v</sub> dorsal  
315 termini development (compare Figure 6H-I to Figures 5A-5D and S6C-E). The expression of GluCl $\alpha$ -  
316 RNAi in LN<sub>v</sub>s resulted in lower amplitude activity rhythms and activity increases that failed to coincide  
317 with the daily rise in temperature (Figures 6H-I), further supporting the notion that the s-LN<sub>v</sub>s are critical  
318 for the reception of glutamate mediated temperature inputs. Thus, reducing the expression of GluCl $\alpha$  in  
319 the s-LN<sub>v</sub>s phenocopied the loss of their dorsal terminal arbors, implicating these sites of structural  
320 plasticity in the reception of glutamatergic inputs relevant for the integration of temperature into the clock  
321 neuron network.

322  
323 **The sites of s-LN<sub>v</sub> plasticity are required for the integration of light and temperature by the**  
324 **circadian clock neuron network.**

325  
326 Though the fruit fly readily entrains its sleep/activity rhythms to both light and temperature cycles, light  
327 has long been recognized as the most powerful environmental time cue for circadian entrainment (Zordan  
328 et al., 2001) (Roenneberg et al., 2013). However, temperature cycles can have strong effects on the timing  
329 of sleep and activity under LD cycles (Harper et al., 2016). Furthermore, the daily pattern of activity  
330 displayed by *Drosophila* in the field, wherein daily changes in both light and temperature occur, is  
331 significantly different from the bimodal pattern displayed by flies under the step function LD cycles and  
332 constant temperatures typically used in the lab, with flies in the field displaying a marked third peak of  
333 activity in the middle of the day (Vanin et al., 2012). The mechanisms through which the clock neuron  
334 network integrates light and temperature cues from the environment is not well understood. Our results  
335 reveal that the dorsal termini of the s-LN<sub>v</sub> mediate the integration of temperature into the clock neuron  
336 network (Figures 5 and S6C-E). The s-LN<sub>v</sub>s are photoreceptive: they express the blue light sensor  
337 Cryptochrome (Yoshii et al., 2008) and receive synaptic inputs from external photoreceptors within the

338 ventrally situated accessory medulla (Li et al., 2018; Schlichting et al., 2016). We therefore wondered if  
339 the dorsal termini of the s-LN<sub>v</sub>s might be critical for the integration of light and temperature cues from the  
340 environment.

341  
342 In nature, diurnal temperature changes lag behind those of light due to heat exchange between air and the  
343 earth's surface. To reflect this lag, we exposed flies to the standard 12:12 LD cycle and a constantly  
344 changing temperature cycle with the heating onset commencing one hour after lights on and the cooling  
345 onset commencing one hour after lights-off (Figure 7A and C, and S8). In wild-type (*w<sup>1118</sup>*), *Pdf-Gal4/+*  
346 and *UAS-Unc5/+* flies, the addition of the gradual temperature cycle resulted in a marked mid-day peak in  
347 activity, in addition to the expected morning and evening peaks under 12:12 LD, reminiscent of the  
348 midday peak of activity observed in the field but lower in amplitude (Figures 7A and C and S8; (Vanin et  
349 al., 2012)). Flies bearing *Unc-5* mediated ablations of the s-LN<sub>v</sub> dorsal termini failed to display the  
350 midday peak (Figures 7A-C), with *Pdf-Gal4/UAS-Unc5* flies displaying significantly lower midday  
351 activity than parental controls (Figure 7B). As for entrainment to gradual temperature cycles in DD  
352 (Figure 5G), the midday peak did not require PDF peptide (Figures 7D and S8). We conclude that the s-  
353 LN<sub>v</sub> dorsal termini are required for the proper integration of light and temperature cues and normally  
354 serve as important sites for sensory integration within the *Drosophila* clock neuron network.

355

## 356 Discussion

### 357 The sites of daily remodeling in the s-LN<sub>v</sub>s are not required for circadian timekeeping or clock 358 output function.

359 A significant body of anatomical and genetic evidence supports the longstanding and widely  
360 accepted conclusion that the dorsal terminal arbors of these cells are critical sites of circadian output  
361 within the fly's timekeeping network (e.g., (Helfrich-Förster, 1998) (Yasuyama and Meinertzhagen,  
362 2010)). Surprisingly, we find that flies in which the development of these terminal ramifications has been  
363 prevented failed to display changes in PDF-mediated timekeeping or output functions. Furthermore, the  
364 absence of these dorsal termini did not prevent the s-LN<sub>v</sub>s from exerting their normal control over  
365 systemic circadian timekeeping under LD or DD conditions. These unexpected results lead us to  
366 conclude that the daily remodeling observed for these neurons is unlikely to mediate circadian output  
367 functions. Rather, they suggest that PDF mediated circadian output from the s-LN<sub>v</sub>s either acts over  
368 relatively long distances within the dorsal protocerebrum or that the major sites of circadian output take  
369 place in another region of the brain. Indeed, serial electron micrograph reconstructions of the s-LN<sub>v</sub>  
370 dorsal projections reveal that PDF is released extrasynaptically in regions unopposed by post-synaptic

371 regions of neighboring neurons (Yasuyama and Meinertzhagen, 2010). Furthermore, recent work has  
372 suggested that the accessory medulla of the ventral brain is an important site of PDF mediated circadian  
373 output (Schlichting et al., 2016). The presence of output synapses in the terminal arbors of the s-LN<sub>v</sub>s  
374 reveals that neurotransmitters are released by these plastic neurites. However, our results suggest that  
375 these outputs mediate signals that are not required for normal endogenous circadian timekeeping.

376         There is precedent for the timekeeping and output functions of the circadian system operating in  
377 the absence of synaptic connections with the nervous system. For example, the loss of wheel running  
378 rhythms caused by the bilateral ablation of the suprachiasmatic nuclei (SCN) is rescued by the  
379 implantation of fetal in the third ventricle of the brain (Lehman et al., 1987), even when the implant is  
380 encased in a semi-permeable capsule that prevents the outgrowth of neurons from the implant (Silver et  
381 al., 1996). Furthermore, genetically compromised cultured SCN slices that are characterized by  
382 arrhythmic expression of Period-Luciferase are rapidly rendered rhythmic when a functional SCN slice is  
383 placed in culture, with a period matching the circadian rhythm of the functional slice (Maywood et al.,  
384 2011). Rescue of clock gene cycling was achieved even when the slices were separated by a layer of mesh  
385 that prevented direct contact of the two slices while allowing for peptidergic communication (Maywood  
386 et al., 2011). In the context of these striking findings it is perhaps not surprising that specific fine  
387 ramifications of a particular group of clock neurons are not required for robust and properly timed  
388 circadian rhythms.

389 **The loss of the sites of daily remodeling in the s-LN<sub>v</sub>s prevents the integration of glutamate**  
390 **mediated time-cues.**

391         The dorsal projections of the s-LN<sub>v</sub>s are axodendritic (Yasuyama and Meinertzhagen, 2010) and  
392 s-LN<sub>v</sub>s appear to form bi-directional connections with the DN1<sub>p</sub> class of clock neurons, cells that link the  
393 s-LN<sub>v</sub>s to neuroendocrine output pathways (Cavanaugh et al., 2014) and that provide feedback to the s-  
394 LN<sub>v</sub>s via glutamate-mediated inhibitory connections (Guo et al., 2016). DN1<sub>p</sub> mediated inhibition of the  
395 s-LN<sub>v</sub>s appears to be critical for the entrainment of the sleep/wake cycle to constantly ramping  
396 temperature cycles (Yadlapalli et al., 2018). Our results indicate the plastic dorsal termini of the s-LN<sub>v</sub>s  
397 are necessary for the normal entrainment of the circadian clock to such temperature cycles and suggest  
398 that the puncta of these termini are sparsely receptive to glutamate via the cys-loop ligand gated chloride  
399 channel GluCl $\alpha$ . We suggest that preventing the development of dorsal termini prevented the normal  
400 formation of DN1<sub>p</sub> glutamatergic synapses onto the s-LN<sub>v</sub> dorsal termini, leading to deficits in the  
401 integration of temperature inputs into the circadian clock neuron network. Thus, the sites of structural  
402 plasticity in the s-LN<sub>v</sub>s mediate sensory input and integration in the key set of clock neurons and daily

403 structural changes in these termini likely result in changes in the number of inhibitory synapses between  
404 the DN1<sub>ps</sub> and the dorsal termini of the s-LN<sub>vs</sub>.

#### 405 **Neuronal plasticity likely characterizes sensory input pathways in both insects and mammals.**

406       Neurons within the suprachiasmatic nuclei of the hypothalamus also display marked daily  
407 structural changes (LeSauter et al., 2009) (Girardet et al., 2010). Remarkably, the density of glutamatergic  
408 synapses onto VIP expressing neurons, cells that mediate functions strikingly similar to those of PDF  
409 expressing LN<sub>vs</sub> in the fly, were found to vary across the diurnal cycle (Girardet et al., 2010). Though the  
410 circadian functions of such remodeling have not been determined experimentally for mammals, they are  
411 hypothesized to underlie the entrainment of the clock to light/dark cycles (Girardet et al., 2010). Our  
412 work strongly links the sites of daily remodeling in a critical set of clock neurons in the fly with glutamate  
413 mediated input and the integration of environmental time-cues.

414       A canonical property of circadian rhythms is that the effect of environmental perturbation on the  
415 free-running system depends on the time at which it is delivered. The same perturbation delivered at  
416 various times in the circadian cycle can produce advances, delays, or have no effect on the subsequent  
417 phase of the rhythm (e.g., (De Coursey, 1960)). Given our findings that sites of structural plasticity  
418 mediate sensory input into the *Drosophila* clock neurons network, we hypothesize that daily changes in  
419 micro-anatomical features of clock containing neurons underlie the gating of such input into the clock  
420 neuron networks of both mammals and insects.

#### 421 **Materials and Methods**

##### 422 **Fly Strains:**

423 Flies were reared on cornmeal-sucrose-yeast media under a 12hr:12hr light:dark (LD) cycle at 25 °C for  
424 standard LD-DD experiments or under constant darkness at 25 °C for temperature ramp experiments. The  
425 following fly lines were used in this study: *;Pdf(BMRJ)-Gal4*; *;;Pdf01* and *;UAS-hid/CyO* (Park et al.,  
426 2000; Renn et al., 1999), (provided by P. Taghert, Wash U Med. School), *yw;Pdf-LexA*; (Shang et al.,  
427 2008) (provided by M. Rosbash, Brandeis), *;;Clk4.1M-LexA* (Cavanaugh et al., 2014) (provided by A.  
428 Seghal, UPENN); *w;UAS-CD8:GFP*; (Lee and Luo, 1999); *w;;UAS-Dicer-2* (Bloomington Stock Center  
429 #24651), *;UAS-GluCl<sup>RNAi</sup>*; (Vienna *Drosophila* Resource Center ID 105754) (Dietzl et al., 2007) *w;UAS-*  
430 *Fas2*; (Dr. V. Budnik, UMSS Med. School), *w;;UAS-Unc5-HA* (Barry Dickson, Janelia Farm) (Keleman  
431 and Dickson, 2001), *UAS-Dscam-TM2-GFP*; *Pin/CyO*; (Wang et al., 2004), *;;UAS-Dbt<sup>LONG</sup>*  
432 *myc(27MIC)/(TM3)* (Jeffrey Price, University of Missouri at Kansas City) (Muskus et al., 2007),  
433 *w;;20xUAS-GCamp6f* (Bloomington Stock Number 52869), and *w;LexAop-mCD8GFP;TM2/TM6B,Tb*  
434 (Bloomington Stock Number 66545).

435

436 **Immunocytochemistry:**

437

438 Immunostaining of whole-mount *Drosophila* adult brains was done as previously described (Fernández et  
439 al., 2008). Flies were entrained to 12:12 LD cycles at 25°C and dissected brains were fixed in 4%  
440 paraformaldehyde for 1 hour at room temperature, blocked with 3% normal goat serum for 1 hour at room  
441 temperature, incubated with primary antibodies at 4° C overnight, and rinsed in PBS + 0.3% Triton (PBS-  
442 TX). The following antibodies were used: mouse anti-PDF (1:500, Developmental Hybridoma Bank),  
443 guinea pig anti- PAP (1:500, provided by Paul Taghert, Wash. U. Med School), and rabbit anti-GFP  
444 (1:1000, Invitrogen A-6455). Brains were rinsed of primary five times for 15 minutes or more with high  
445 agitation tumbling in PBS-TX and then kept in secondary antibody cocktail at 4° C overnight or for 2 h at  
446 room temperature and then rinsed in PBS-TX again as for primary. Brains were rinsed three times in  
447 PBS, mounted on a poly-L-lysine coated cover slip, dehydrated/cleared in a graded glycerol series (30%,  
448 50% and 70% glycerol in PBS, 5-min each), and then mounted between coverslip bridges in HardSet  
449 Vectashield Mounting Medium (Vector Laboratories, Burlingame, CA). All samples were imaged on an  
450 Olympus Fluoview 1000 laser-scanning confocal microscope using either a UplanSApo 20x/0.75 NA or a  
451 60x/1.10 NA W, FUMFL N objective (Olympus, Center Valley, PA). The arbor area and projection  
452 length of the s-LN<sub>v</sub>s were quantified using the Fiji platform (Schindelin et al., 2012) in ImageJ (Schneider  
453 et al., 2012). The length of the dorsal projection was determined by a line drawn from the point at which  
454 the s-LN<sub>v</sub>s dorsal projection and the posterior optic tract of the l-LN<sub>v</sub>s bifurcate near the accessory  
455 medulla to the end of the shortest neurite in control flies or at the distal end of the ‘bundle’ at the dorsal  
456 termini of Unc5 or Fas2 expressing s-LN<sub>v</sub>s. Area was determined by tracing the perimeter of the entire  
457 arbor in a projected Z-series. Imaris (Oxford Instruments, Abingdon, UK) was used for three dimensional  
458 reconstructions of the dorsal termini that were the basis of the quantification of x-spread, y-spread, z-  
459 spread, and total 3-D arbor spread.

460

461 **Live Imaging:**

462 *w;Pdf(BMRJ)-Gal4/+;UAS-GCaMP6f/+* and *w;Pdf(BMRJ)-Gal4/+;UAS-GCaMP6f/UAS-Unc5-HA* flies  
463 were anesthetized on ice, immobilized with a minuten pin through the thorax onto a 35mM Sylgard dish,  
464 and dissected under ice cold hemolymph-like saline (HL3) consisting of (in mM): 70 NaCl, 5 KCl, 1.5  
465 CaCl<sub>2</sub>, 20 MgCl<sub>2</sub>, 10 NaHCO<sub>3</sub>, 5 trehalose, 115 sucrose, 5 HEPES; pH 7.1 (Stewart et al., 1994)  
466 containing 2μM Tetrodotoxin citrate (TTX) (Tocris, Bristol, U.K.). After dissection of all cuticle and  
467 pigmented eye tissue, brains were allowed to adhere to the bottom of poly-lysine coated 35 mm cellular



468 culture dish (Becton Dickenson Labware, Franklin Lakes, NJ) under a drop of HL3 contained within a  
469 petri dish perfusion insert placed on the bottom of the dish with double sided adhesive (Bioscience Tools,  
470 San Diego, CA). Perfusion flow was established over the brain with a gravity-fed PS-8H perfusion  
471 system (Bioscience Tools, San Diego, CA). Test compounds were delivered to mounted brains by  
472 switching perfusion flow from the main HL3+TTX line to another channel containing 0.5 mM or 1.0 mM  
473 L-glutamate (Sigma Aldrich, St. Louis) in HL3 containing 2 $\mu$ M TTX, pH 7.1. To control for the effects  
474 of switching channels, we perfused HL3 + TTX from a second line as a vehicle control.

475

476 Live imaging was performed on an Olympus FV1000 laser-scanning microscope (Olympus, Center  
477 Valley, PA) under a 60x/1.10 NA W, FUMFL N objective (Olympus, Center Valley, PA). Single optical  
478 sections were scanned with a 488 nm laser at 1 Hz for 105 frames and GCaMP6f emission was directed to  
479 a photomultiplier tube by means of a DM405/488 dichroic mirror. Termini were imaged for 30s under  
480 constant HL3-TTX flow and then switched manually to a line containing 0.5 mM or 1.0 mM glutamate in  
481 HL3+TTX or a second line of HL3-TTX (Vehicle) for 15 or 30s and then switched back to the initial  
482 HL3-TTX line for the remaining frames of the time-course. For each dissected brain, vehicle controls  
483 were performed first followed immediately by glutamate treatments, starting with the lowest  
484 concentration. Time-courses characterized by significant movement artefacts during or after line switches  
485 were omitted from our analysis.

486 Time-courses of GCaMP6f fluorescence were measured in Fiji (Schindelin et al., 2012) in ImageJ  
487 (Schneider et al., 2012). Six to ten regions of interest (ROIs) were selected over single GCaMP6f  
488 expressing puncta of the s-LN<sub>v</sub> dorsal termini, or over the bulbous ends of the Unc5-expressing dorsal  
489 projections, in which case six to ten ROIs of sizes comparable to those used over single puncta in normal  
490 dorsal termini. Mean pixel intensities (values between 0 and 4095) were collected for each ROI at each  
491 time point. Raw intensity plots were visualized for each ROI and plots were normalized to the initial  
492 fluorescence were constructed using the timepoint 15s before line switching as F<sub>0</sub>. Normalized plots were  
493 used to pool and compare vehicle and glutamate responses.

494

#### 495 **Locomotor activity rhythm recording and analysis:**

496

497 Locomotor activity rhythms of adult male flies were recorded using DAM2 *Drosophila* Activity  
498 Monitors (TriKinetics, Waltham, MA). Three- to five-day old flies were placed individually in Trikinetics  
499 capillary tubes containing 2% agar- 4% sucrose food at one end sealed with paraffin wax, plugged with a

500 small length of yarn, and loaded onto the DAM2 monitors for locomotor activity recording. For standard  
501 LD entrainment and transfer to constant darkness (DD) free-run experiments, flies were entrained to  
502 12:12 LD cycles for at least five days, and then released into constant darkness (DD) for at least eight  
503 days, at a constant temperature of 25°C. Activity counts were collected in 1-minute bins that were  
504 subsequently summed into 30-minute bins for the time-series analysis of locomotor activity.

505  
506 Averaged population activity profiles of specific genotypes in LD were generated in Matlab (MathWorks,  
507 Natick). First, activity levels were normalized for individual flies, by setting the average activity level for  
508 all 30-min bins across the last four days in LD equal to 1.0. Population averages of this normalized  
509 activity were then determined for each 30-min bin over the number of LD cycles indicated in the results  
510 and figure legends. Finally, the population averages for the LD cycles were averaged into a single  
511 representative 24-hour day, which are displayed as either histograms or line plots.

512  
513 Morning anticipation of light transitions under 12:12 LD was quantified by fitting 30-min binned beam  
514 crossing data over the last six hours of the night, with a least-squares linear regression. The beam crossing  
515 data for this six-hour window was averaged for the last 3 days of LD for individual flies and then  
516 normalized relative total activity for each fly within this window. These data were plotted for single flies  
517 in Matlab using the ‘scatter’ plotting function along with the least-squares regression lines fit to the  
518 average six-hour activity time-courses (Supplemental Figures S2 and S3). These scatter plots and  
519 regressions were overlaid with a line representing the average of the all individual fly regression lines.  
520 The slopes of individual regression lines were used as a metric of morning anticipation for single flies.  
521 The same approach was applied to the six hours preceding lights-on for the quantification of evening  
522 anticipation.

523  
524 The phases of morning and evening peaks of individual flies on day one of DD were determined as  
525 previously described (Yao et al., 2016). Briefly, individual time-courses of beam crossings/30min through  
526 the first day under DD were subjected to a zero-phase Butterworth filter to diminish oscillations with  
527 periods of less than 20 hours (Levine et al., 2002). The ‘Findpeaks’ function in the Signal Processing  
528 Toolbox of Matlab was used for each fly’s filtered activity plot to identify the morning and evening peaks  
529 of activity, and their corresponding phases expressed as Circadian Time (CT). The morning and evening  
530 peak phases of experimental genotypes were compared to those of their parental controls using a Kruskal-  
531 Wallis one-way ANOVA and Dunn’s multiple comparison test. A summary of all pairwise comparisons  
532 is listed in Supplementary Table S1. In the case of the *w;Pdf(BMRJ)-Gal4/+;UAS- Dbt<sup>LONG</sup>/UAS-Unc5*

533 *flies*, we compared the behavior of these flies to all of the relevant single P-element heterozygotes and all  
534 double heterozygote combinations.

535

536 For circular statistics and rose plots, we transformed the negative and positive phases into proper hours on  
537 the 00-24h time scale by taking all phases modulo 24, and then converting the proper hours into radians.

538 The zero-hour ZT00 is set at 24h, or  $2\pi$  radians. We then applied the Watson two-sample test to  
539 determine whether the phases for control and experimental lines are significantly different. Watson's non-  
540 parametric two sample U 2 statistic provides a criterion to test whether two samples differ significantly  
541 from each other. We performed nine tests using both the *Watson-Wheeler Test for Homogeneity of Angles*  
542 and the *Watson's Two-Sample Test of Homogeneity* from the circular R library, designed and  
543 implemented for analyzing circular data. For both tests, the null hypothesis is that the two samples of  
544 angles come from the same underlying population.

545

546 We analyzed free-running activity rhythms using ClockLab software from Actimetrics (Wilmette, IL) as  
547 previously described (Yao and Shafer, 2014). In brief, rhythmicity, rhythmic power, and free-running  
548 period of individual flies were analyzed using Clocklab's  $\chi$ -square periodogram function implemented in  
549 ClockLab, based on a confidence level of 0.01 (Sokolove and Bushell, 1978). For all genotypes tested,  
550 significant periodicities between 14 and 34 hours were considered. For individuals that displayed more  
551 than one periodicity with a peak over significance, only the highest amplitude period was used for the  
552 determination of average periods displayed in Table 1 and S1. For each peak in the  $\chi$ -square periodogram,  
553 Clock Lab returns a "Power" value and a "Significance" value. As previously described (Pfeiffenberger et  
554 al., 2010) (Yao and Shafer, 2014), "Rhythmic Power" was calculated by subtracting the Significance  
555 value from the Power value of the predominant peak for every fly designated as rhythmic, and was  
556 considered "0" for flies that failed to display a peak periodicity above significance.

557

558 To examine entrainment to naturalistic, gradually ramping temperature cycles, flies were reared under  
559 constant darkness (DD) at 25°C and then entrained to temperature cycles that gradually and constantly  
560 increased from 20 °C to 28 °C from ZT 00 to ZT 12 and gradually and constantly decreased from 28 °C to  
561 20 °C from ZT 12-00 under DD. Flies were entrained under such temperature cycles for eight days.

562 Averaged individual population activity plots were constructed for the last three days of temperature  
563 entrainment. The tracking of daily activity with rising environmental temperature was quantified as a  
564 "Heating Index" as described previously (Yadlapalli et al., 2018). Under the temperature conditions used  
565 here, flies displayed a startle response at the onset of heating that was dwarfed by the daily peak of  
566 activity that coincided with the warmest daily temperatures. To further quantify the extent to which daily

567 activity rose with increasing daily temperature, we computed the ratios of evening peak activity (beam  
568 crossings between ZT 10-12) to morning peak activity (beam crossings between ZT 0-2) for days 6-8 of  
569 temperature ramp entrainment.

570

## 571 **Acknowledgments:**

572

573 We thank Paul Taghert, Rae Silver, and Patrizia Casaccia for critical reading a draft of this manuscript.  
574 We also thank Paul Taghert, and Bing Ye for useful discussions about the work and Barry Dickson, Greg  
575 Bashaw, Paul Taghert, Michel Rosbash, Vivian Budnick, and the Bloomington *Drosophila* Stock Center  
576 for sharing fly lines. The authors would like to acknowledge the Live Imaging and Bioenergetics Facility  
577 of CUNY Advanced Science Research Center for instrument use, and scientific and technical assistance  
578 and its director Dr. Ye He for sharing her expertise and for her assistance in the use of Imaris software.  
579 We also thank the members of the Fernández and Shafer labs for comments on the text.

580

## 581 **Figure Legends**

582

583 **Figure 1. Overexpression of the axon guidance receptor *Unc5* eliminates the dorsal arbor from the**  
584 **s-LN<sub>v</sub>s. (A)** Representative confocal images of an anti-GFP immunostaining showing the left  
585 hemispheres of a ;*Pdf-Gal4/UAS-mCD8::GFP*; (top) and ;*Pdf-Gal4/UAS-mCD8::GFP;UAS-Unc5/+*  
586 (bottom) adult brain (left) and a magnified image of the s-LN<sub>v</sub>s projections extending into the dorsal  
587 protocerebrum (right). The cell bodies of the s-LN<sub>v</sub>s are located in the anterior ventral brain and their  
588 dorsal projections extend posteriorly and then turn toward the midline where they form a complex net of  
589 termini. Scale bar 50μm. Dorsal, ventral, medial, and lateral directions indicated at the bottom left of the  
590 top left panel. The dashed lines indicate the midline in the two left panels. l-LN<sub>v</sub>s indicate the large  
591 ventral lateral neurons, s-LN<sub>v</sub>s indicate the small ventral lateral neurons, DP indicates the dorsal  
592 projection, OL the medulla of the optic lobe, and OT, the posterior optic tract. **(B)** Confocal  
593 reconstructions of the dorsal termini of the s-LN<sub>v</sub>s in the dorsal protocerebrum of *Pdf-Gal4/UAS-*  
594 *mCD8::GFP*; (top) and ;*Pdf-Gal4/UAS-mCD8::GFP;UAS-Unc5/+* (bottom) flies. The left column  
595 shows anti-PDF immunostaining, the middle column anti-GFP immunostaining (green), and the right  
596 merged micrographs with PDF in magenta and GFP in green. **(C)** View of the dorsal termini of *Pdf-*  
597 *Gal4/UAS-mCD8::GFP*; (left) and ;*Pdf-Gal4/UAS-mCD8::GFP;UAS-Unc5/+* (right) dorsal termini  
598 through the dorsal surface of the brain. Scale bars = 15μM. **(D)** Comparison of 180 degree rotations of the  
599 dorsal projections of *Pdf-Gal4/UAS-mCD8::GFP*; (left) and ;*Pdf-Gal4/UAS-mCD8::GFP;UAS-Unc5/+*  
600 (right). Panels represent rotations of the projected Z-series starting from a lateral view and ending with a

601 medial view of the projections. (E-J) Quantification of the effects of Unc5 expression on dorsal  
602 projection length (E), the brain area (i.e., X-Y spread) innervated by the dorsal termini in a collapsed Z-  
603 series from a posterior aspect (F) and the spread of these termini in the lateral medial (G), dorsal ventral  
604 (H) and anterior posterior (I) axes. The total three-dimensional spread of the dorsal termini is compared  
605 in (J). For E-J asterisks indicate significant differences. \*\* P < 0.01, \*\*\* P < 0.001. Error bars represent  
606 the standard error of the mean (SEM). See Table S1 for statistical information and sample sizes.

607

608 **Figure 2. s-LN<sub>v</sub> dorsal arbors are not required for PDF dependent behavioral outputs under**

609 **light/dark conditions.** (A) Population averaged activity profiles of wild-type (WT) and *Pdf<sup>01</sup>* mutant flies  
610 during days two to six of entrainment to a 12h:12h LD cycle. Compared to the wild type activity profile  
611 (left panel) *Pdf<sup>01</sup>* mutants lack morning anticipation (blue arrow) and exhibit an advanced evening peak of  
612 activity (gray arrow) (Renn et al., 1999). (B) The morning anticipation index is significantly different in  
613 WT and *Pdf<sup>01</sup>* mutant flies. See also Figure S2A. (C) Population averaged activity profiles of *;Pdf-*  
614 *Gal4/+;UAS-Unc5/+* flies and their heterozygous parental controls reveal no *Pdf<sup>01</sup>*-like effects on  
615 morning or evening peaks of activity. (D) *;Pdf-Gal4/+;UAS-Unc5/+* flies do not differ significantly from  
616 their parental controls in morning anticipation (experimental flies are shown in red, dark gray indicates  
617 the *;UAS-Unc5/+* parental control, light gray indicates the *;Pdf-Gal4/+* parental control). (E) *;Pdf-*  
618 *Gal4/+;UAS-Unc5/+* flies also fail to display *Pdf<sup>01</sup>* like evening peak phenotypes (WT and *Pdf<sup>01</sup>* phases  
619 are shown on the left for comparison). Average evening peak phases are displayed +/- SEM. “0” marks  
620 the time of lights-off. Dark gray indicates night. See supplemental Table S1 for sample sizes and  
621 statistics.

622

623 **Figure 3. s-LN<sub>v</sub>s lacking dorsal termini maintain their control of systemic circadian timekeeping.**

624

625 (A) Representative double plotted actograms for flies under 8 days of LD entrainment followed by 10  
626 days of free-running under constant darkness and temperature (DD) of the genotypes indicated. Both  
627 *;Pdf-Gal4/+;UAS-Dbt<sup>LONG</sup>/+* and *;Pdf-Gal4/+;UAS-Dbt<sup>LONG</sup>/UAS-Unc5/* flies exhibit significantly  
628 lengthened free-running periods. Red arrow indicates switch to DD conditions. (B) Summary of the  
629 percentage of flies displaying significant circadian periodicity under DD following entrainment to LD  
630 cycles. (C) Mean free-running period for seven days of DD activity rhythms. The endogenous periods of  
631 *;Pdf-Gal4/+;UAS-Dbt<sup>LONG</sup>/+* and *;Pdf-Gal4/+;UAS-Dbt<sup>LONG</sup>/UAS-Unc5/* flies are not significantly  
632 different and are significantly longer than all their parental control lines. \*\* P < 0.01, \*\*\* P < 0.001. Error  
633 bars indicate SEM. (D) Rose plots of evening activity peaks on the first day of free run under DD for the  
634 genotypes indicated. “0” marks the time 24-hours after the final lights-on event during the LD cycle.

635 Control ;*uas-Unc5*/+ flies displayed relatively early evening peak phases, but experimental ;*Pdf-*  
636 *Gal4*/+;*uas-Unc5*/+ flies did not differ from ;*Pdf-Gal4*/+ controls (left plot). The expression of *Dbt*<sup>LONG</sup>  
637 in the Pdf-expressing neurons results in a significantly delayed evening peak (middle plot). The co-  
638 expression of *Unc5* with *Dbt*<sup>LONG</sup> in the Pdf-expressing neurons did not prevent the delayed evening peak  
639 (right plot). Details of the circular statistical analysis are described in *Materials and Methods*. See also S1  
640 for statistical information and sample sizes.

641  
642 **Figure 4. The expression of *Unc5* causes significant changes in the anatomical relationship between**  
643 **the neurites of the DN1<sub>p</sub>s and the dorsal projections of the s-LN<sub>v</sub>s.** (A) Confocal reconstruction of s-  
644 LN<sub>v</sub> dorsal projections and the neurites of the DN1<sub>p</sub> clock neurons in the dorsal protocerebrum of ;*Pdf-*  
645 *Gal4/LexAop-mCD8:GFP;Clk4.1LexA*/+ flies. Brains were immuno-labelled for GFP (green) and PDF  
646 (magenta) and imaged through the posterior surface of the brain. Small panels display single gray scale  
647 reconstructions of GFP (top) and PDF expression (bottom). The medial (m), lateral (l) and ventral (v)  
648 extensions of the DN1<sub>p</sub> neurons are indicated in the top right panel. (B) Confocal reconstruction of s-LN<sub>v</sub>  
649 dorsal projections and the neurites of the DN1<sub>p</sub> clock neurons in the dorsal protocerebrum of ;*Pdf-*  
650 *Gal4/LexAop-mCD8:GFP;Clk4.1LexA/UAS-Unc5* immunolabeled and imaged as described for A. Scale  
651 bars=30µm for all panels.

652  
653 **Figure 5. s-LN<sub>v</sub> terminal arbors mediate entrainment to temperature ramps.** (A) Representative  
654 actograms of single flies entrained for 8-days to constantly changing temperature ramps under DD  
655 followed by one week of free running at 25 °C under DD. During entrainment, temperature progressively  
656 increased from 20 °C to 28 °C between ZT 0-12 and gradually decreased from 28 °C to 20 °C between ZT  
657 12-0. Blue to red gradients indicate heating phase, red to blue gradients indicate cooling phase. Genotypes  
658 are indicated above actograms. (B) Calculated ratios of evening peak activity between ZTs 10-12 to  
659 morning peak activity between ZTs 0-2 for flies of the following genotypes: ;*Pdf-Gal4*/+; ;*Pdf-*  
660 *Gal4*/+;*UAS-Unc5*/+, and ;;*UAS-Unc5*/+. (C) Averaged population activity plots for the last three days  
661 of entrainment to the temperature cycle (days six to eight). Straight black lines represent temperature  
662 changes. Dashed vertical lines indicate transition points between cooling and heating phases. Blue to red  
663 gradients indicate heating phase, red to blue gradients indicate cooling phase. ZT0 is the beginning of the  
664 heating phase (T= 20 °C), ZT12 is the end of the heating phase (T= 28 °C). (D) Heating indices, which  
665 reflect the correlation between environmental heating and increases in locomotor activity, for the  
666 genotypes indicated. (E) Averaged population activity plots and (F) heating indices for flies in which the  
667 proapoptotic gene *hid* was expressed in the PDF expressing LN<sub>v</sub>s compared to heterozygote parental  
668 controls. (G) Averaged population activity plots and (H) heating indices for *pdf*<sup>01</sup> mutants and their



669 genetic background control,  $w^{1118}$ . For all histograms, \*  $P < 0.05$ , \*\*  $P < 0.01$ , \*\*\*  $P < 0.001$ , and NS  
670 indicates not significantly different. For all activity plots, lines represent mean  $\pm$  SEM. See Table S1 for  
671 statistical information and sample sizes.

672

673 **Figure 6. Puncta of the s-LN<sub>v</sub> termini are sparsely receptive to glutamate and display rebound**  
674 **excitation following glutamate perfusion. (A-C):** Representative glutamate responses for the majority  
675 of s-LN<sub>v</sub> dorsal terminal puncta observed. (A) Expression of GCaMP6f in single puncta of the s-LN<sub>v</sub>  
676 dorsal projections. Regions of interest (ROIs) are indicated for the plots below. Scale Bar = 5 $\mu$ m. (B)  
677 GCaMP6f fluorescence traces for the ROIs shown in A before, during, and after 30 s perfusion of vehicle  
678 (black bar). (C) GCaMP6f fluorescence traces for the ROIs shown in A before, during, and after 30 s  
679 perfusion of 1mM glutamate (black bar). (D-G). Representative glutamate response for the subset of  
680 glutamate receptive s-LN<sub>v</sub> dorsal terminal puncta. (D) Expression of GCaMP6f in single puncta of s-LN<sub>v</sub>  
681 dorsal projections. Regions of interest (ROIs) are indicated for the plots below. Scale Bar = 5 $\mu$ m. (E)  
682 GCaMP6f fluorescence traces for the ROIs shown in D before, during, and after 30 s perfusion of vehicle  
683 (black bar). (F) GCaMP6f fluorescence traces for the ROIs shown in A before, during, and after 30 s  
684 perfusion of 0.5mM glutamate (black bar), reveal a large excitatory response immediately after washout.  
685 (G) GCaMP6f fluorescence traces for the ROIs shown in A before, during, and after 30 s perfusion of  
686 1mM glutamate (black bar), reveal large excitatory responses that commence slightly before washout.  
687 (H) Averaged population activity plots under ramping temperature cycles for experimental ;*Pdf-*  
688 *Gal4/UAS-GluCl $\alpha$ -RNAi;UAS-Dicer2* flies (purple) and their parental heterozygote controls ;*Pdf-Gal4/+*  
689 (black) and ;*UAS-GluCl $\alpha$ -RNAi/+;UAS-Dicer2/+* (gray). Plots represent the last three days of  
690 entrainment to a ramping temperature cycle (days 6-8), wherein temperature progressively increased from  
691 20 °C to 28 °C between ZT 0-12 and gradually decreased from 28 °C to 20 °C between ZT 12-0. The  
692 straight black lines represent temperature changes. Dashed vertical lines indicate transition points  
693 between cooling and heating phases. Blue to red gradients indicate heating phase, red to blue gradients  
694 indicate cooling phase. ZT0 is the beginning of the heating phase (T= 20 °C), ZT12 is the end of the  
695 heating phase (T= 28 °C). (I) Heating indices for the genotypes shown in H, which reflect the correlation  
696 between environmental heating and increases in locomotor activity. \*\*  $P < 0.01$ ; \*\*\*  $P < 0.001$ . See  
697 Table S1 for statistical information and sample sizes.

698

699 **Figure 7. Prevention of s-LN<sub>v</sub> terminal arbor development prevents the integration of temperature**  
700 **and light cycles. (A)** Representative actograms of single flies ;*Pdf-Gal4/+;* ;*Pdf-Gal4/+;UAS-Unc5/+*,  
701 *and ;;UAS-Unc5/+* flies entrained for 8-days to constantly changing temperature ramps under a 12:12  
702 LD cycle followed by one week of free running conditions under DD at 25 °C. During entrainment,

703 temperature progressively increased from 20 °C to 28 °C between ZT 1-13 and gradually decreased from  
704 28 °C to 20 °C between ZT 13-1, with heat and cooling commencing one hour after lights-on and lights-  
705 off, respectively. Blue to red gradients indicate heating phase, red to blue gradients indicate cooling  
706 phase. White arrow indicates a mid-day peak. **(B)** Comparison of mid-day activity levels for the  
707 genotypes shown in A. \*\*\* P < 0.001. **(C)** Averaged population activity plots of ;*Pdf-Gal4/+*; , ;*Pdf-*  
708 *Gal4/+;uas-Unc5/+*, and ;*UAS-Unc5/+* flies for five days (days two to six) of entrainment to offset  
709 ramping temperature cycle under LD. Straight red lines represent temperature increases, straight blue  
710 lines represent temperature decreases. Blue to red gradients indicate heating phase, red to blue gradients  
711 indicate cooling phase. ZT0 corresponds to lights-on, with heating commencing one hour after dawn. The  
712 presence of the temperature cycle has produced marked mid-day peaks in ;*Pdf-Gal4/+*; , and ;*UAS-*  
713 *Unc5/+* controls but fails to do so in experimental ;*Pdf-Gal4/+;uas-Unc5/+* flies. **(D)** Comparison of  
714 mid-day activity in control (*w<sup>1118</sup>*) and *Pdf<sup>01</sup>* mutant flies under a 12:12 LD cycle with an offset ramping  
715 temperature cycle. The loss of PDF peptide does not prevent the promotion of mid-day activity by  
716 ramping temperature cycles (see also Figure S7).

717

718

## 719 Supplemental Figures

720

721 **Figure S1. Overexpression of the axon guidance receptor *Unc5* specifically affects the s-LN<sub>v</sub> dorsal**  
722 **termini.** **(A)** Confocal Z-series reconstructions of five examples of anti-GFP immunolabeling of brains  
723 from *Pdf-Gal4/UAS-mCD8::GFP;UAS-Unc5/+* flies revealing the extent to which the development of the  
724 dorsal termini of the of s-LN<sub>v</sub> dorsal projection was prevented by *Unc5* expression. Images represent an  
725 scanning area of 75 μm x 75 μm. All the brains examined (n=40) revealed a complete absence of the  
726 dorsal termini. **(B)** The *UAS-Unc5* element alone does not cause arbor phenotypes (left). The posterior  
727 optic tract (POT) of the large LN<sub>v</sub>s was not affected by the expression of *Unc5* (right panel). Scale bar =  
728 50 μm. **(C)** *Unc5* expressing s-LN<sub>v</sub>s display a modest de-fasciculation of ascending dorsal projection,  
729 consistently displaying more visually distinct, un-fasciculated neurites than controls (see also Figure 1A,  
730 lower right panel). \*\*\* P < 0.001.

731

732 **Figure S2. Anticipation indices reflect activity before the lights on and off transitions.** **(A)** Least-  
733 squares linear regression of normalized 30-min binned activity levels of individual flies (gray points and  
734 lines) during the last six hours of the night. Slopes of the individual fly regressions were used to quantify  
735 morning anticipation. The averaged regression line is shown in red. As expected, both the *Pdf<sup>01</sup>* mutant  
736 and the *Clk<sup>irk</sup>* mutant lack the gradual increase in activity seen in wild type flies in the hours before lights

737 on. **(B)** Evening Anticipation Index: an equivalent six-hour analysis of activity during the six hours before  
738 the lights-off transition for the same flies shown in A. Least-squares linear regression of normalized 30-  
739 min binned activity levels of individual flies are indicated by the gray points and lines. The averaged  
740 regression line is shown in blue. While the *Clk<sup>jk</sup>* mutant lacks the gradual increase in evening activity  
741 seen in wild type flies, the *Pdf<sup>01</sup>* mutant exhibits clear anticipation of lights-off.

742

743 **Figure S3. Neither morning nor evening anticipation are affected by Unc5 overexpression in Pdf+**  
744 **cells.** **(A)** The mean morning peak phase of experimental *;Pdf-Gal4/+;UAS-Unc5/+* flies is not  
745 significantly different than that of *;uas-Unc5/+* controls. **(B)** *Pdf-Gal4/+;UAS-Unc5/+* flies display  
746 robust free-running rhythms of locomotor activity, indistinguishable from their parental controls. **(C)** The  
747 least-squares regression approach to the quantification of evening peak reveals robust anticipation in both  
748 wild-type (*w<sup>1118</sup>*) and *Pdf<sup>01</sup>* mutant flies. **(D)** Evening anticipation indices were not significantly different  
749 between *;Pdf-Gal4/+;UAS-Unc5/+* experimental flies and *Pdf-Gal4/+* controls. \*\*\* P < 0.001 and NS  
750 indicates no significant difference between groups.

751

752 **Figure S4. Unc5 expression in the LN<sub>v</sub>s does not prevent a slow molecular clock from inducing a**  
753 **long free running period of activity rhythms.** **(A)** Population averaged activity profiles of *;UAS-*  
754 *Dbt<sup>LONG</sup>/+* controls (left), *Pdf-Gal4/UAS-Dbt<sup>LONG</sup>* flies (center), and *;Pdf-Gal4/+;UAS-Dbt<sup>LONG</sup>/UAS-Unc5*  
755 (right). The expression of Unc-5 did not prevent the resetting of the evening peak (arrows) by the *Pdf-*  
756 expressing LN<sub>v</sub>s. **(B)** Representative  $\chi$ -square periodograms for flies under seven days of free-running  
757 conditions (DD). Genotypes are indicated above the periodograms. Both *;Pdf-Gal4/+;UAS-Dbt<sup>LONG</sup>/+* and  
758 *;Pdf-Gal4/+;UAS-Dbt<sup>LONG</sup>/UAS-Unc5* flies exhibit significantly longer free-running periods compared to  
759 all parental controls. See Table S1 for statistical information and sample sizes.

760

761 **Figure S5. Fas2-mediated elimination the dorsal termini of the s-LN<sub>v</sub>s does not affect the timing of**  
762 **activity under LD cycles.** **(A-C)** Representative confocal images of an anti-GFP immunostaining  
763 showing the left hemisphere of a *;Pdf-Gal4/+;UAS-mCD8::GFP,UAS-Fas2/+* adult brain **(A)** and a  
764 magnified image of the s-LN<sub>v</sub> dorsal projection **(B)** top panel, anti- PDF staining middle panel, anti-GPF  
765 staining bottom panel, merged images with PDF shown in magenta and GFP shown in green. **(C)**  
766 Examples of the absence of s-LN<sub>v</sub> dorsal termini ramification in five brains from *;Pdf-Gal4/+UAS-*  
767 *mCD8::GFP;UAS-Fas2/+* flies. Images represent an area of 75  $\mu$ m x 75  $\mu$ m. **(D)** Quantification of the  
768 length of the s-LN<sub>v</sub>s projection for control *;Pdf-Gal4/UAS-mCD8::GFP*; and experimental *;Pdf-*  
769 *Gal4/UAS-mCD8::GFP;UAS-Fas2/+* brains. **(E)** Quantification of area of s-LN<sub>v</sub>s dorsal terminal  
770 innervation for the genotypes shown in D. **(F)** Population averaged activity plot for *;Pdf-Gal4/+;UAS-*

771 *Fas2*/+ flies during days 3-5 of a 12h:12h LD cycle at a constant 25 °C. Neither the morning nor the  
772 evening peak are affected by the expression of *Fas2*. (G) Morning anticipation indices for ;*Pdf*-  
773 *Gal4*/+; *UAS-Fas2*/+ (blue) and for ;*Pdf-Gal4*/+; and ; *UAS-Fas2*/+ controls (gray). See Table S1 for  
774 sample sizes and statistical information. \*\*\* P < 0.001 and NS = Not Significant. Error bars represent  
775 SEM.

776

777 **Figure S6. *Fas2*-mediated elimination the dorsal termini of the s-LN<sub>v</sub>s does not affect endogenous**  
778 **circadian timekeeping but impairs entrainment to temperature ramps.** (A) Normalized activity during  
779 the first three days of free-running conditions under DD. Dark gray indicates subjective night and light gray  
780 indicates subjective day. (B) Percentage of rhythmic flies under DD, based on ten days of free-run. There  
781 were no significant differences between the three genotypes as determined by a Fisher's exact test. (C)  
782 Averaged population activity plots for the last three days of entrainment to gradually ramping temperature  
783 cycles (days 6-8) for the genotypes indicated. The straight black line represents temperature change. Blue  
784 to red gradients indicate heating phase, red to blue gradients indicate cooling phase. ZT0 is the beginning  
785 of the heating phase (T= 20 °C), ZT12 is the end of the heating phase (T= 28 °C). (D) Representative  
786 actograms of single flies entrained for 8-days to constantly changing temperature ramps under DD followed  
787 by one week of free running at 25 °C under DD. During entrainment, temperature progressively increased  
788 from 20 °C to 28 °C between ZT 0-12 and gradually decreased from 28 °C to 20 °C between ZT 12-0. Blue  
789 to red gradients indicate heating phase, red to blue gradients indicate cooling phase. Genotypes are indicated  
790 above actograms. (E) Calculated ratios of evening peak activity between ZTs 10-12 to morning peak  
791 activity between ZTs 0-2 for flies of the following genotypes: ;*Pdf-Gal4*/+; ; *Pdf-Gal4*/+; *UAS-Fas2*/+;  
792 and ; *UAS-Fas2*/+. The heating index did not capture the clear differences in amplitude displayed by  
793 experimental flies in this case.

794

795

796 **Figure S7. Truncated *Unc5* expressing s-LN<sub>v</sub> termini are sparsely receptive to glutamate and**  
797 **display rebound excitation following glutamate perfusion.** (A-C): Representative glutamate responses  
798 for the majority of truncated s-LN<sub>v</sub> dorsal termini observed from ;*Pdf-Gal4*/+; *UAS-GCaMP6f*/*UAS-Unc5*  
799 flies. (A) Expression of GCaMP6f in the dorsal terminus of *Unc5*-expressing s-LN<sub>v</sub>s. Regions of interest  
800 (ROIs) are indicated for the plots below. Scale bars = 5µm. (B) GCaMP6f fluorescence traces for the  
801 ROIs shown in A before, during, and after 30 s perfusion of vehicle (black bar). (C) GCaMP6f  
802 fluorescence traces for the ROIs shown in A before, during, and after 30s perfusion of 1mM glutamate  
803 (black bar). (D-G). Representative glutamate responses for receptive s-LN<sub>v</sub> dorsal terminal puncta. (D)  
804 Expression of GCaMP6f in the dorsal terminus of *Unc5*-expressing s-LN<sub>v</sub>s. Regions of interest (ROIs) are

805 indicated for the plots below. Scale bars = 5 $\mu$ m. (E) GCaMP6f fluorescence traces for the ROIs shown in  
806 D before, during, and after 30 s perfusion of vehicle (black bar). (F) GCaMP6f fluorescence traces for  
807 the ROIs shown in A before, during, and after 30 s perfusion of 0.5 mM glutamate (black bar), reveal a  
808 large excitatory response that commences slightly before washout. (G) GCaMP6f fluorescence traces for  
809 the ROIs shown in A before, during, and after 30 s perfusion of 1.0 mM glutamate (black bar), reveal a  
810 large excitatory response that commences well before washout. (H) Expression of the dendritic marker  
811 Dscam<sup>TM2</sup>GFP in the s-LN<sub>v</sub> dorsal projection ;*Pdf-Gal4/UAS-Dscam<sup>TM2</sup>-GFP*; flies. Anti-PDF  
812 immunostaining is shown on the left, anti-GFP immunostaining is shown on the right. (I) Expression of  
813 the dendritic marker Dscam<sup>TM2</sup>GFP in the s-LN<sub>v</sub> dorsal projections from ;*Pdf-Gal4/UAS-Dscam<sup>TM2</sup>-*  
814 *GFP;UAS-Unc5/+* flies. Anti-PDF immunostaining is shown on the left, anti-GFP immunostaining is  
815 shown on the right. The truncated dorsal termini of Unc5-expressing s-LN<sub>v</sub>s maintain the expression of  
816 this dendritic reporter.

817

818 **Figure S8. The production of a daily, temperature-induced mid-day peak under LD cycles does not**  
819 **require PDF.** (A) Averaged population activity plots of control *w<sup>1118</sup>* flies and *Pdf<sup>01</sup>* mutants for five days  
820 under offset temperature cycle under LD (days two to six). Straight red lines represent temperature  
821 increases, straight blue lines represent temperature decreases. Blue to red gradients indicate heating phase,  
822 red to blue gradients indicate cooling phase. ZT0 corresponds to lights-on, with heating commencing one  
823 hour after dawn. The presence of the temperature cycle results in marked mid-day peaks in both control  
824 (*w<sup>1118</sup>*) and *Pdf<sup>01</sup>* mutant flies. (B) Representative actograms of control (*w<sup>1118</sup>*) and *Pdf<sup>01</sup>* mutant flies  
825 entrained for 8-days to constantly changing temperature ramps under a 12:12 LD cycle followed by one  
826 week of free running conditions under DD at 25 °C. During entrainment, temperature progressively  
827 increased from 20 °C to 28 °C between ZT 1-13 and gradually decreased from 28 °C to 20 °C between ZT  
828 13-1, with heat and cooling commencing one hour after lights-on and lights-off, respectively. Blue to red  
829 gradients indicate heating phase, red to blue gradients indicate cooling phase. White arrows indicate mid-  
830 day peaks.

831

832

833

834

835

836

837

838

839 **Table 1:**  
840

| <b>Genotype</b>                                 | <b>Number of flies</b> | <b>% Rhythmic</b> | <b>Period <math>\pm</math> SEM (h)</b> | <b>Rhythmic Power <math>\pm</math> SEM</b> |
|-------------------------------------------------|------------------------|-------------------|----------------------------------------|--------------------------------------------|
| <i>w<sup>1118</sup></i>                         | 41                     | 100               | 23.8 $\pm$ 0.04                        | 137.5 $\pm$ 8.0                            |
| <i>;Pdf-Gal4/+;</i>                             | 55                     | 100               | 24.0 $\pm$ 0.02                        | 172.4 $\pm$ 7.9                            |
| <i>;;UAS-Unc5/+</i>                             | 62                     | 98.4              | 23.6 $\pm$ 0.03                        | 171.7 $\pm$ 6.2                            |
| <i>;;UAS-Dbt<sup>L</sup>/+</i>                  | 58                     | 100               | 23.9 $\pm$ 0.03                        | 144.7 $\pm$ 5.4                            |
| <i>;;UAS-Dbt<sup>L</sup> /UAS-Unc5</i>          | 54                     | 100               | 23.6 $\pm$ 0.03                        | 152.9 $\pm$ 8.0                            |
| <i>;Pdf-Gal4/+;UAS-Unc5/+</i>                   | 40                     | 100               | 24.0 $\pm$ 0.04                        | 134.1 $\pm$ 8.9                            |
| <i>;Pdf-Gal4/+;UAS-Dbt<sup>L</sup>/+</i>        | 36                     | 96.6              | 27.2 $\pm$ 0.1                         | 95.9 $\pm$ 9.6                             |
| <i>;Pdf-Gal4/+;UAS-Dbt<sup>L</sup>/UAS-Unc5</i> | 58                     | 100               | 26.2 $\pm$ 0.20                        | 126.6 $\pm$ 7.7                            |

841  
842  
843  
844  
845  
846  
847  
848  
849  
850  
851  
852  
853  
854  
855  
856  
857  
858  
859



860 **References:**

861

862 Aton, S.J., Colwell, C.S., Harmar, A.J., Waschek, J., and Herzog, E.D. (2005). Vasoactive  
863 intestinal polypeptide mediates circadian rhythmicity and synchrony in mammalian clock  
864 neurons. *Nature Neuroscience* 8, 476.

865

866 Becquet, D., Girardet, C., Guillaumond, F., François-Bellan, A.-M., and Bosler, O. (2008).  
867 Ultrastructural plasticity in the rat suprachiasmatic nucleus. Possible involvement in clock  
868 entrainment. *Glia* 56, 294-305.

869

870 Boehme, R., Uebele, V.N., Renger, J.J., and Pedroarena, C. (2011). Rebound excitation triggered  
871 by synaptic inhibition in cerebellar nuclear neurons is suppressed by selective T-type calcium  
872 channel block. *Journal of Neurophysiology* 106, 2653-2661.

873

874 Bosler, O., Girardet, C., Franc, J.-L., Becquet, D., and François-Bellan, A.-M. (2015). Structural  
875 plasticity of the circadian timing system. An overview from flies to mammals. *Frontiers in*  
876 *Neuroendocrinology* 38, 50-64.

877

878 Cavanaugh, Daniel J., Geratowski, Jill D., Wooltorton, Julian R.A., Spaethling, Jennifer M.,  
879 Hector, Clare E., Zheng, X., Johnson, Erik C., Eberwine, James H., and Sehgal, A. (2014).  
880 Identification of a Circadian Output Circuit for Rest:Activity Rhythms in *Drosophila*. *Cell* 157,  
881 689-701.

882

883 Chatterjee, A., Lamaze, A., De, J., Mena, W., Chélot, E., Martin, B., Hardin, P., Kadener, S.,  
884 Emery, P., and Rouyer, F. (2018). Reconfiguration of a Multi-oscillator Network by Light in the  
885 *Drosophila* Circadian Clock. *Current Biology* 28, 2007-2017.e2004.

886

887 Chen, C., Buhl, E., Xu, M., Croset, V., Rees, J.S., Lilley, K.S., Benton, R., Hodge, J.J.L., and  
888 Stanewsky, R. (2015). *Drosophila* Ionotropic Receptor 25a mediates circadian clock resetting by  
889 temperature. *Nature* 527, 516.

890

891 Chen, T.-W., Wardill, T.J., Sun, Y., Pulver, S.R., Renninger, S.L., Baohan, A., Schreiter, E.R.,  
892 Kerr, R.A., Orger, M.B., Jayaraman, V., *et al.* (2013). Ultrasensitive fluorescent proteins for  
893 imaging neuronal activity. *Nature* 499, 295.

894

895 Colwell, C.S., Michel, S., Itri, J., Rodriguez, W., Tam, J., Lelievre, V., Hu, Z., Liu, X., and  
896 Waschek, J.A. (2003). Disrupted circadian rhythms in VIP- and PHI-deficient mice. *American*  
897 *Journal of Physiology-Regulatory, Integrative and Comparative Physiology* 285, R939-R949.

898

899 Currie, J., Goda, T., and Wijnen, H. (2009). Selective entrainment of the *Drosophila* circadian  
900 clock to daily gradients in environmental temperature. *BMC Biology* 7, 49.

901

902 Cusumano, P., Biscontin, A., Sandrelli, F., Mazzotta, G.M., Tregnago, C., De Pittà, C., and  
903 Costa, R. (2018). Modulation of miR-210 alters phasing of circadian locomotor activity and  
904 impairs projections of PDF clock neurons in *Drosophila melanogaster*. *PLOS Genetics* 14,  
905 e1007500.

- 906  
907 De Coursey, P.J. (1960). Daily Light Sensitivity Rhythm in a Rodent. *Science* *131*, 33-35.  
908  
909 Depetris-Chauvin, A., Berni, J., Aranovich, Ezequiel J., Muraro, Nara I., Beckwith, Esteban J.,  
910 and Ceriani, María F. (2011). Adult-Specific Electrical Silencing of Pacemaker Neurons  
911 Uncouples Molecular Clock from Circadian Outputs. *Current Biology* *21*, 1783-1793.  
912  
913 Depetris-Chauvin, A., Fernández-Gamba, Á., Gorostiza, E.A., Herrero, A., Castaño, E.M., and  
914 Ceriani, M.F. (2014). Mmp1 Processing of the PDF Neuropeptide Regulates Circadian Structural  
915 Plasticity of Pacemaker Neurons. *PLOS Genetics* *10*, e1004700.  
916  
917 Fernández, M.P., Berni, J., and Ceriani, M.F. (2008). Circadian Remodeling of Neuronal Circuits  
918 Involved in Rhythmic Behavior. *PLOS Biology* *6*, e69.  
919  
920 Gielen, M., Thomas, P., and Smart, T.G. (2015). The desensitization gate of inhibitory Cys-loop  
921 receptors. *Nature Communications* *6*, 6829.  
922  
923 Girardet, C., Blanchard, M.-P., Ferracci, G., Lévêque, C., Moreno, M., François-Bellan, A.-M.,  
924 Becquet, D., and Bosler, O. (2010). Daily changes in synaptic innervation of VIP neurons in the  
925 rat suprachiasmatic nucleus: contribution of glutamatergic afferents. *European Journal of*  
926 *Neuroscience* *31*, 359-370.  
927  
928 Golombek, D.A., and Rosenstein, R.E. (2010). Physiology of Circadian Entrainment.  
929 *Physiological Reviews* *90*, 1063-1102.  
930  
931 Gorostiza, E.A., Depetris-Chauvin, A., Frenkel, L., Pérez, N., and Ceriani, María F. (2014).  
932 Circadian Pacemaker Neurons Change Synaptic Contacts across the Day. *Current Biology* *24*,  
933 2161-2167.  
934  
935 Gunawardhana, K.L., and Hardin, P.E. (2017). VRILLE Controls PDF Neuropeptide  
936 Accumulation and Arborization Rhythms in Small Ventrolateral Neurons to Drive Rhythmic  
937 Behavior in *Drosophila*. *Current Biology* *27*, 3442-3453.e3444.  
938  
939 Guo, F., Yu, J., Jung, H.J., Abruzzi, K.C., Luo, W., Griffith, L.C., and Rosbash, M. (2016).  
940 Circadian neuron feedback controls the *Drosophila* sleep–activity profile. *Nature* *536*, 292.  
941  
942 Harper, Ross E.F., Dayan, P., Albert, Joerg T., and Stanewsky, R. (2016). Sensory Conflict  
943 Disrupts Activity of the *Drosophila* Circadian Network. *Cell Reports* *17*, 1711-1718.  
944  
945 Hastings, M.H., Maywood, E.S., and Brancaccio, M. (2018). Generation of circadian rhythms in  
946 the suprachiasmatic nucleus. *Nature Reviews Neuroscience* *19*, 453-469.  
947  
948 Helfrich-Förster, C. (1995). The period clock gene is expressed in central nervous system  
949 neurons which also produce a neuropeptide that reveals the projections of circadian pacemaker  
950 cells within the brain of *Drosophila melanogaster*. *Proceedings of the National Academy of*  
951 *Sciences* *92*, 612-616.

- 952 Helfrich-Förster, C. (1997). Development of pigment-dispersing hormone-immunoreactive  
953 neurons in the nervous system of *Drosophila melanogaster*. *Journal of Comparative Neurology*  
954 *380*, 335-354.  
955
- 956 Helfrich-Förster, C. (1998). Robust circadian rhythmicity of *Drosophila melanogaster* requires  
957 the presence of lateral neurons: a brain-behavioral study of disconnected mutants. *Journal of*  
958 *Comparative Physiology A* *182*, 435-453.  
959
- 960 Herzog, E.D. (2007). Neurons and networks in daily rhythms. *Nature Reviews Neuroscience* *8*,  
961 790.  
962
- 963 Hyun, S., Lee, Y., Hong, S.-T., Bang, S., Paik, D., Kang, J., Shin, J., Lee, J., Jeon, K., Hwang,  
964 S., *et al.* (2005). *Drosophila* GPCR Han Is a Receptor for the Circadian Clock Neuropeptide  
965 PDF. *Neuron* *48*, 267-278.  
966
- 967 Keleman, K., and Dickson, B.J. (2001). Short- and Long-Range Repulsion by the *Drosophila*  
968 *Unc5* Netrin Receptor. *Neuron* *32*, 605-617.  
969
- 970 Krzeptowski, W., Hess, G., and Pyza, E. (2018). Circadian Plasticity in the Brain of Insects and  
971 Rodents. *Frontiers in Neural Circuits* *12*.  
972
- 973 Lear, B.C., Merrill, C.E., Lin, J.-M., Schroeder, A., Zhang, L., and Allada, R. (2005). A G  
974 Protein-Coupled Receptor, *groom-of-PDF*, Is Required for PDF Neuron Action in Circadian  
975 Behavior. *Neuron* *48*, 221-227.  
976
- 977 Lee, T., and Luo, L. (1999). Mosaic Analysis with a Repressible Cell Marker for Studies of Gene  
978 Function in Neuronal Morphogenesis. *Neuron* *22*, 451-461.  
979
- 980 Lehman, M., Silver, R., Gladstone, W., Kahn, R., Gibson, M., and Bittman, E. (1987). Circadian  
981 rhythmicity restored by neural transplant. Immunocytochemical characterization of the graft and  
982 its integration with the host brain. *The Journal of Neuroscience* *7*, 1626-1638.  
983
- 984 LeSauter, J., Bhuiyan, T., Shimazoe, T., and Silver, R. (2009). Circadian Trafficking of  
985 Calbindin-ir in Fibers of SCN Neurons. *Journal of Biological Rhythms* *24*, 488-496.  
986
- 987 Levine, J.D., Funes, P., Dowse, H.B., and Hall, J.C. (2002). Signal analysis of behavioral and  
988 molecular cycles. *BMC Neuroscience* *3*, 1.  
989
- 990 Li, M.-T., Cao, L.-H., Xiao, N., Tang, M., Deng, B., Yang, T., Yoshii, T., and Luo, D.-G. (2018).  
991 Hub-organized parallel circuits of central circadian pacemaker neurons for visual  
992 photoentrainment in *Drosophila*. *Nature Communications* *9*, 4247.  
993
- 994 Maywood, E.S., Chesham, J.E., O'Brien, J.A., and Hastings, M.H. (2011). A diversity of  
995 paracrine signals sustains molecular circadian cycling in suprachiasmatic nucleus circuits.  
996 *Proceedings of the National Academy of Sciences* *108*, 14306-14311.  
997

- 998 Mertens, I., Vandingenen, A., Johnson, E.C., Shafer, O.T., Li, W., Trigg, J.S., De Loof, A.,  
999 Schoofs, L., and Taghert, P.H. (2005). PDF Receptor Signaling in *Drosophila* Contributes to  
1000 Both Circadian and Geotactic Behaviors. *Neuron* 48, 213-219.  
1001
- 1002 Muskus, M.J., Preuss, F., Fan, J.-Y., Bjes, E.S., and Price, J.L. (2007). *Drosophila*  
1003 DBT Lacking Protein Kinase Activity Produces Long-Period and Arrhythmic Circadian  
1004 Behavioral and Molecular Rhythms. *Molecular and Cellular Biology* 27, 8049-8064.  
1005
- 1006 Park, J.H., Helfrich-Förster, C., Lee, G., Liu, L., Rosbash, M., and Hall, J.C. (2000). Differential  
1007 regulation of circadian pacemaker output by separate clock genes in *Drosophila*.  
1008 *Proceedings of the National Academy of Sciences* 97, 3608-3613.  
1009
- 1010 Petsakou, A., Sapsis, Themistoklis P., and Blau, J. (2015). Circadian Rhythms in Rho1 Activity  
1011 Regulate Neuronal Plasticity and Network Hierarchy. *Cell* 162, 823-835.  
1012
- 1013 Pfeiffenberger, C., Lear, B.C., Keegan, K.P., and Allada, R. (2010). Processing Sleep Data  
1014 Created with the *Drosophila* Activity Monitoring (DAM) System. *Cold Spring Harbor Protocols*  
1015 2010, pdb.prot5520.  
1016
- 1017 Renn, S.C.P., Park, J.H., Rosbash, M., Hall, J.C., and Taghert, P.H. (1999). A pdf Neuropeptide  
1018 Gene Mutation and Ablation of PDF Neurons Each Cause Severe Abnormalities of Behavioral  
1019 Circadian Rhythms in *Drosophila*. *Cell* 99, 791-802.  
1020
- 1021 Roenneberg, T., Daan, S., and Merrow, M. (2003). The Art of Entrainment. *Journal of Biological*  
1022 *Rhythms* 18, 183-194.  
1023
- 1024 Roenneberg, T., Kantermann, T., Juda, M., Vetter, C., and Allebrandt, K.V. (2013). Light and  
1025 the Human Circadian Clock. In *Circadian Clocks*, A. Kramer, and M. Merrow, eds. (Berlin,  
1026 Heidelberg: Springer Berlin Heidelberg), pp. 311-331.  
1027
- 1028 Roenneberg, T., and Merrow, M. (2016). The Circadian Clock and Human Health. *Current*  
1029 *Biology* 26, R432-R443.  
1030
- 1031 Schindelin, J., Arganda-Carreras, I., Frise, E., Kaynig, V., Longair, M., Pietzsch, T., Preibisch,  
1032 S., Rueden, C., Saalfeld, S., Schmid, B., *et al.* (2012). Fiji: an open-source platform for  
1033 biological-image analysis. *Nature Methods* 9, 676.  
1034
- 1035 Schlichting, M., Menegazzi, P., Lelito, K.R., Yao, Z., Buhl, E., Dalla Benetta, E., Bahle, A.,  
1036 Denike, J., Hodge, J.J., Helfrich-Förster, C., *et al.* (2016). A Neural Network Underlying  
1037 Circadian Entrainment and Photoperiodic Adjustment of Sleep and Activity in  
1038 *Drosophila*. *The Journal of Neuroscience* 36, 9084-9096.  
1039
- 1040 Schneider, C.A., Rasband, W.S., and Eliceiri, K.W. (2012). NIH Image to ImageJ: 25 years of  
1041 image analysis. *Nature Methods* 9, 671.  
1042

- 1043 Shafer, O.T., and Taghert, P.H. (2009). RNA-Interference Knockdown of *Drosophila* Pigment  
1044 Dispersing Factor in Neuronal Subsets: The Anatomical Basis of a Neuropeptide's Circadian  
1045 Functions. *PLOS ONE* 4, e8298.  
1046
- 1047 Shang, Y., Griffith, L.C., and Rosbash, M. (2008). Light-arousal and circadian photoreception  
1048 circuits intersect at the large PDF cells of the *Drosophila* brain. *Proceedings of the*  
1049 *National Academy of Sciences* 105, 19587-19594.  
1050
- 1051 Silver, R., LeSauter, J., Tresco, P.A., and Lehman, M.N. (1996). A diffusible coupling signal  
1052 from the transplanted suprachiasmatic nucleus controlling circadian locomotor rhythms. *Nature*  
1053 382, 810-813.  
1054
- 1055 Sivachenko, A., Li, Y., Abruzzi, Katharine C., and Rosbash, M. (2013). The Transcription Factor  
1056 Mef2 Links the *Drosophila* Core Clock to Fas2, Neuronal Morphology, and Circadian Behavior.  
1057 *Neuron* 79, 281-292.  
1058
- 1059 Sokolove, P.G., and Bushell, W.N. (1978). The chi square periodogram: Its utility for analysis of  
1060 circadian rhythms. *Journal of Theoretical Biology* 72, 131-160.  
1061
- 1062 Stewart, B.A., Atwood, H.L., Renger, J.J., Wang, J., and Wu, C.-F. (1994). Improved stability of  
1063 *Drosophila* larval neuromuscular preparations in haemolymph-like physiological solutions.  
1064 *Journal of Comparative Physiology A* 175, 179-191.  
1065
- 1066 Stoleru, D., Peng, Y., Nawathean, P., and Rosbash, M. (2005). A resetting signal between  
1067 *Drosophila* pacemakers synchronizes morning and evening activity. *Nature* 438, 238.  
1068
- 1069 Takemura, S.-Y., Lu, Z., and Meinertzhagen, I.A. (2008). Synaptic circuits of the *Drosophila*  
1070 optic lobe: The input terminals to the medulla. *Journal of Comparative Neurology* 509, 493-513.  
1071
- 1072 Vanin, S., Bhutani, S., Montelli, S., Menegazzi, P., Green, E.W., Pegoraro, M., Sandrelli, F.,  
1073 Costa, R., and Kyriacou, C.P. (2012). Unexpected features of *Drosophila* circadian behavioural  
1074 rhythms under natural conditions. *Nature* 484, 371.  
1075
- 1076 Wang, J., Ma, X., Yang, J.S., Zheng, X., Zugates, C.T., Lee, C.-H.J., and Lee, T. (2004).  
1077 Transmembrane/Juxtamembrane Domain-Dependent Dscam Distribution and Function during  
1078 Mushroom Body Neuronal Morphogenesis. *Neuron* 43, 663-672.  
1079
- 1080 Yadlapalli, S., Jiang, C., Bahle, A., Reddy, P., Meyhofer, E., and Shafer, O.T. (2018). Circadian  
1081 clock neurons constantly monitor environmental temperature to set sleep timing. *Nature* 555, 98.  
1082
- 1083 Yao, Z., Bennett, A.J., Clem, J.L., and Shafer, O.T. (2016). The *Drosophila* Clock Neuron  
1084 Network Features Diverse Coupling Modes and Requires Network-wide Coherence for Robust  
1085 Circadian Rhythms. *Cell Reports* 17, 2873-2881.  
1086
- 1087 Yao, Z., and Shafer, O.T. (2014). The *Drosophila* Circadian Clock Is a Variably Coupled  
1088 Network of Multiple Peptidergic Units. *Science* 343, 1516-1520.

- 1089 Yasuyama, K., and Meinertzhagen, I.A. (2010). Synaptic connections of PDF-immunoreactive  
1090 lateral neurons projecting to the dorsal protocerebrum of *Drosophila melanogaster*. *Journal of*  
1091 *Comparative Neurology* *518*, 292-304.
- 1092
- 1093 Yoshii, T., Todo, T., Wülbeck, C., Stanewsky, R., and Helfrich-Förster, C. (2008).  
1094 Cryptochrome is present in the compound eyes and a subset of *Drosophila*'s clock neurons.  
1095 *Journal of Comparative Neurology* *508*, 952-966.
- 1096
- 1097 Zhang, L., Chung, B.Y., Lear, B.C., Kilman, V.L., Liu, Y., Mahesh, G., Meissner, R.-A., Hardin,  
1098 P.E., and Allada, R. (2010). DN1p Circadian Neurons Coordinate Acute Light and PDF Inputs to  
1099 Produce Robust Daily Behavior in *Drosophila*. *Current Biology* *20*, 591-599.
- 1100
- 1101 Zordan, M.A., Rosato, E., Piccin, A., and Foster, R. (2001). Photic entrainment of the circadian  
1102 clock: from *Drosophila* to mammals. *Seminars in Cell & Developmental Biology* *12*, 317-328.
- 1103



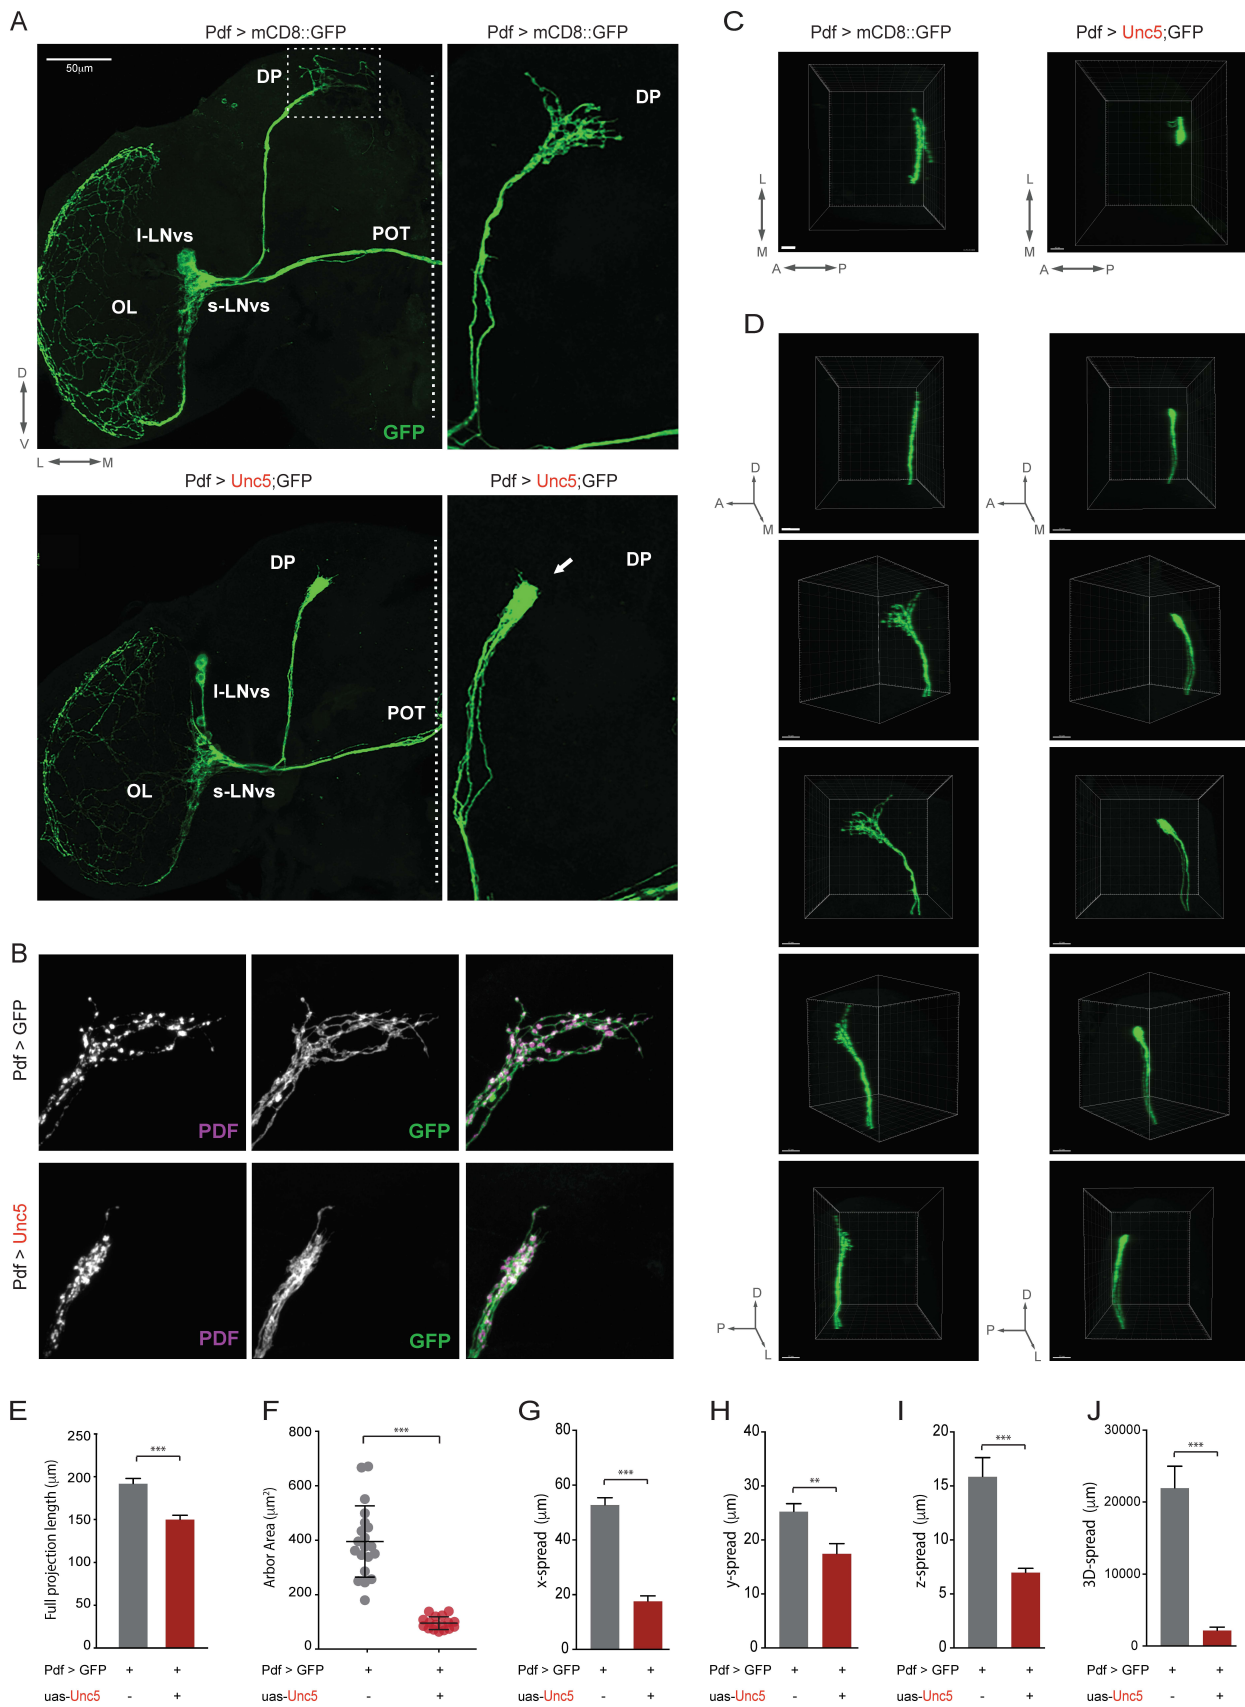

**Figure 1.** Overexpression of the axon guidance receptor Unc5 eliminates the dorsal arbor from the s-LNvs.

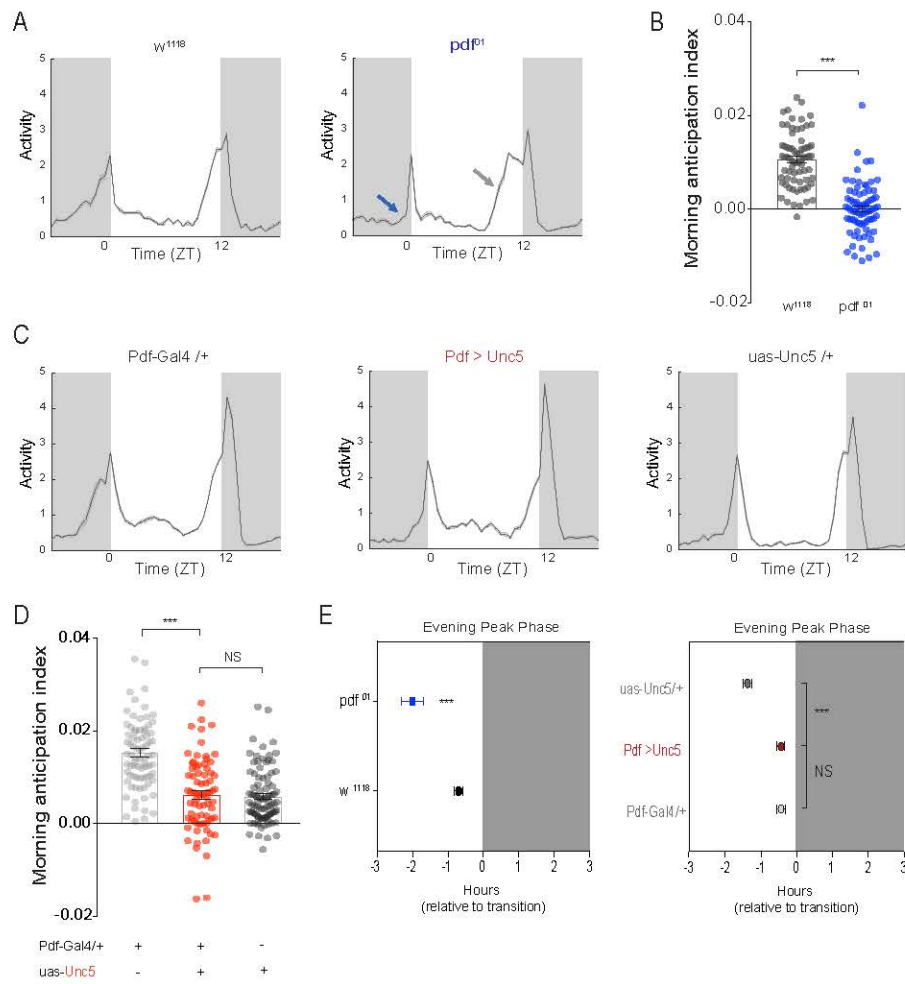

**Figure 2.** s-LNv dorsal arbor is not required for PDF dependent behavioral outputs under light/dark conditions.

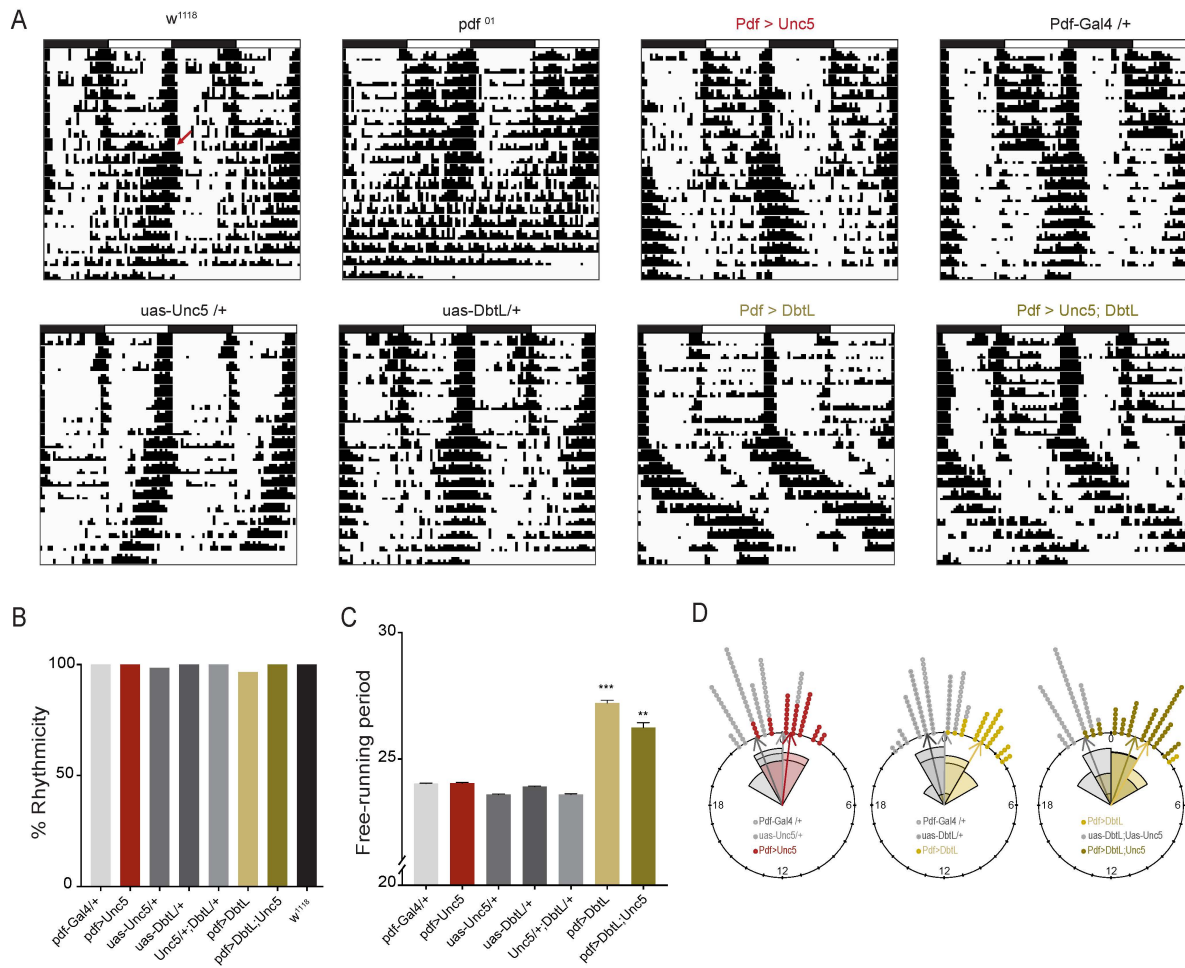

**Figure 3.** s-LNvs lacking dorsal termini maintain their control of systemic circadian timekeeping.

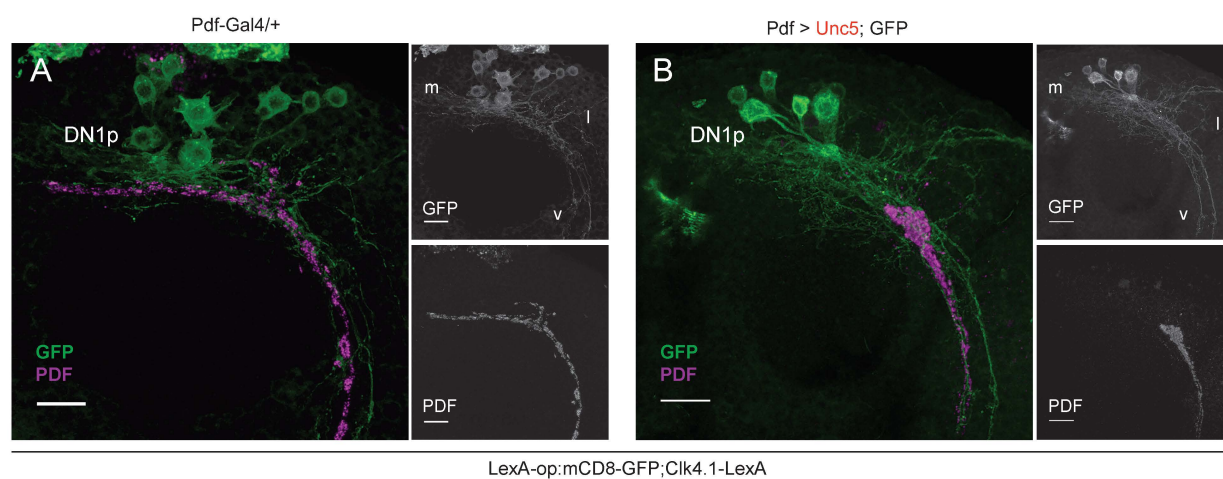

**Figure 4.** The expression of *Unc5* causes significant changes in the anatomical relationship between the neurites of the DN1ps and the dorsal projections of the s-LNvs.

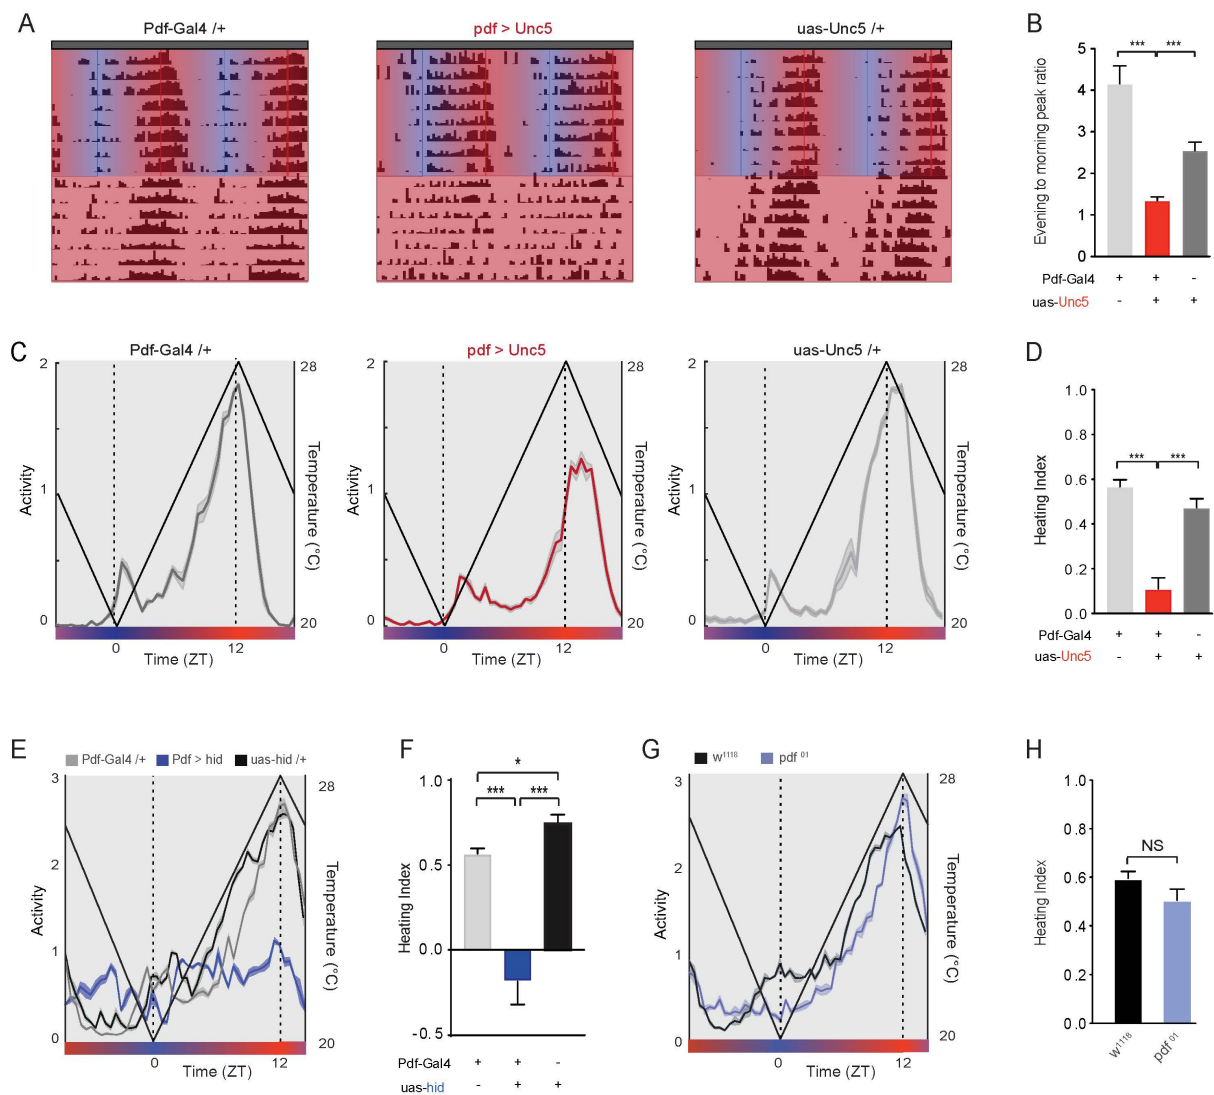

**Figure 5.** s-LNV terminal arbors mediate entrainment to temperature ramps.

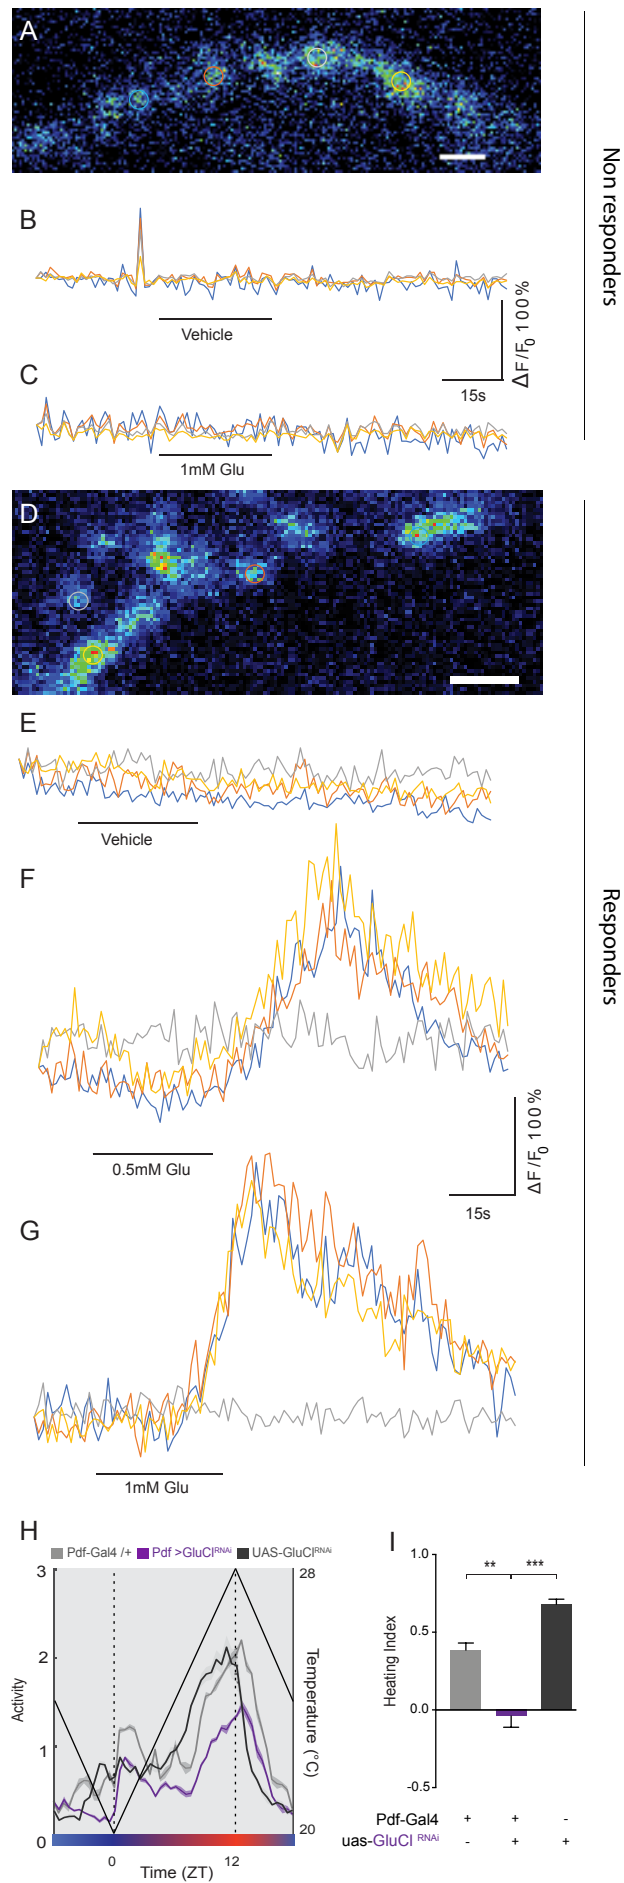

**Figure 6.** Puncta of the s-LNv termini are sparsely receptive to glutamate and display rebound excitation following glutamate perfusion.



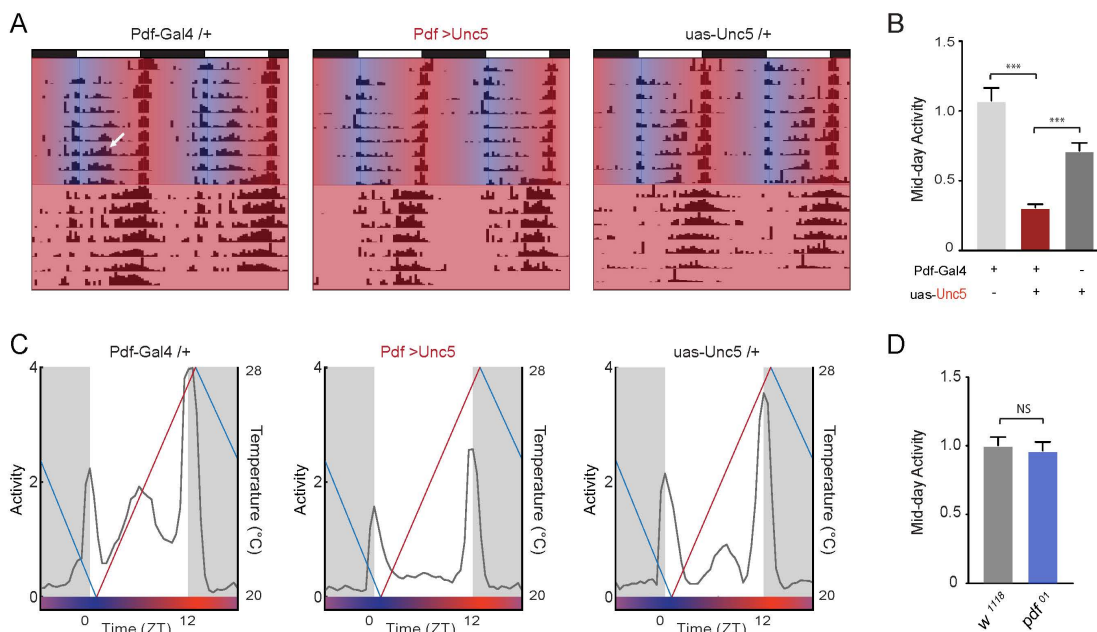

**Figure 7.** Prevention of s-LNVs terminal arbor development prevents the integration of temperature and light cycles.
